# Supplementary material for: Citrus Huanglongbing is a pathogen-triggered immune disease that can be mitigated with antioxidants and gibberellin
Source: PubMed Central journal article supplement (PMC8791970; doi:10.1038/s41467-022-28189-9), 2022-01-26
Supplement: 41467_2022_28189_MOESM1_ESM.pdf [file 41467_2022_28189_MOESM1_ESM.pdf]

**Table S1: Overexpression of CLas proteins containing Sec-section signals and other predicated virulence factors in *Arabidopsis*, *Citrus* and *Nicotiana***

| Locus          | Annotation                  | SDE | Overexpressed in <i>Arabidopsis thaliana</i> |    |           | Overexpressed in <i>Citrus</i> |    |           | Overexpressed in <i>N. tabacum</i> |    |           | Reference |
|----------------|-----------------------------|-----|----------------------------------------------|----|-----------|--------------------------------|----|-----------|------------------------------------|----|-----------|-----------|
|                |                             |     | PCR                                          | WB | Phenotype | PCR                            | WB | Phenotype | PCR                                | WB | Phenotype |           |
| CLIBASIA_00460 |                             | Y   | +                                            | +  | Normal    |                                |    |           |                                    |    |           |           |
| CLIBASIA_00530 |                             | Y   | +                                            | +  | Normal    |                                |    |           |                                    |    |           |           |
| CLIBASIA_02145 |                             | Y   | +                                            | -  | Normal    |                                |    |           |                                    |    |           |           |
| CLIBASIA_02215 |                             | Y   | +                                            | +  | Normal    |                                |    |           |                                    |    |           |           |
| CLIBASIA_02470 |                             | Y   | +                                            | -  | Normal    |                                |    |           |                                    |    |           |           |
| CLIBASIA_02935 |                             | Y   | +                                            | -  | Normal    |                                |    |           | +                                  | -  | Normal    |           |
| CLIBASIA_03695 |                             | Y   | +                                            | +  | Normal    |                                |    |           |                                    |    |           |           |
| CLIBASIA_03975 |                             | Y   | +                                            | -  | Normal    |                                |    |           |                                    |    |           |           |
| CLIBASIA_04320 |                             | Y   | +                                            | -  | Normal    |                                |    |           |                                    |    |           |           |
| CLIBASIA_04580 |                             | Y   | +                                            | -  | Normal    |                                |    |           |                                    |    |           |           |
| CLIBASIA_04735 |                             | Y   | +                                            | -  | Normal    |                                |    |           |                                    |    |           |           |
| CLIBASIA_05115 | predicated virulence factor | Y   | +                                            | +  | Normal    |                                |    |           |                                    |    |           |           |
| CLIBASIA_05320 |                             | Y   | +                                            | -  | Normal    |                                |    |           |                                    |    |           |           |
| CLIBASIA_05330 |                             | Y   | +                                            | +  | Normal    |                                |    |           |                                    |    |           |           |
| CLIBASIA_04260 | OmpA                        |     | +                                            | +  | Normal    |                                |    |           |                                    |    |           |           |
| CLIBASIA_03315 | predicated virulence factor |     | +                                            | +  | Normal    |                                |    |           |                                    |    |           |           |
| CLIBASIA_03105 | Flp/Fap pilin component     |     | +                                            | +  | Normal    |                                |    |           |                                    |    |           |           |
| CLIBASIA_05640 |                             | Y   | +                                            | +  | Normal    |                                |    |           |                                    |    |           |           |
| CLIBASIA_02305 |                             | Y   | +                                            | +  | Normal    |                                |    |           |                                    |    |           |           |
| CLIBASIA_03085 |                             | Y   | +                                            | +  | Normal    |                                |    |           |                                    |    |           |           |
| CLIBASIA_00420 | outer membrane lipoprotein  |     | +                                            | +  | Normal    |                                |    |           |                                    |    |           |           |
| CLIBASIA_01300 | predicated virulence factor |     | +                                            | -  | Normal    |                                |    |           |                                    |    |           |           |
| CLIBASIA_01345 | serralysin                  |     | +                                            | -  | Normal    |                                |    |           | +                                  | -  | Normal    |           |

|                |                               |   |   |   |        |   |   |        |   |   |        |   |
|----------------|-------------------------------|---|---|---|--------|---|---|--------|---|---|--------|---|
| CLIBASIA_02425 | outer membrane protein        |   | + | - | Normal |   |   |        |   |   |        |   |
| CLIBASIA_03295 | predicated virulence factor   |   | + | - | Normal |   |   |        |   |   |        |   |
| CLIBASIA_04055 | predicated virulence factor   |   | + | + | Normal |   |   |        |   |   |        |   |
| CLIBASIA_04520 | predicated virulence factor   |   | + | - | Normal |   |   |        | + | - | Normal |   |
| CLIBASIA_04410 |                               | Y | + | + | Normal |   |   |        |   |   |        |   |
| CLIBASIA_05150 |                               | Y | + | + | Normal |   |   |        |   |   |        |   |
| CLIBASIA_01640 | predicated virulence factor   |   | + | + | Normal |   |   |        |   |   |        |   |
| CLIBASIA_04865 | predicated virulence factor   |   | + | + | Normal |   |   |        |   |   |        |   |
| CLIBASIA_04405 |                               | Y | + | + | Normal | + | + | Normal | + | + | Normal |   |
| CLIBASIA_05160 | predicated virulence factor   |   | + | + | Normal |   |   |        |   |   |        |   |
| CLIBASIA_05475 | predicated virulence factor   |   | + | + | Normal |   |   |        |   |   |        |   |
| CLIBASIA_04025 | SDE15                         | Y | + | + | Normal | + | + | Normal | + | + | Normal | 1 |
| CLIBASIA_05315 | SDE1                          | Y |   |   |        | + | + | Normal | + | + | Normal | 2 |
| CLIBASIA_02845 |                               | Y |   |   |        | + | + | Normal | + | + | Normal |   |
| CLIBASIA_00255 | SahA                          |   |   |   |        |   |   |        | + | + | Normal | 3 |
| CLIBASIA_00830 | cytochrome-c oxidase          |   |   |   |        |   |   |        | + | - | Normal |   |
| CLIBASIA_04330 |                               | Y |   |   |        |   |   |        | + | + | Normal |   |
| CLIBASIA_00470 |                               | Y |   |   |        |   |   |        | + | + | Normal |   |
| CLIBASIA_02160 | metalloprotease               |   |   |   |        |   |   |        | + | + | Normal |   |
| CLIBASIA_04030 |                               | Y |   |   |        |   |   |        | + | + | Normal |   |
| CLIBASIA_00520 |                               | Y |   |   |        |   |   |        | + | - | Normal |   |
| CLIBASIA_02395 | TPR repeat-containing protein |   |   |   |        |   |   |        | + | - | Normal |   |
| CLIBASIA_04040 |                               | Y |   |   |        |   |   |        | + | - | Normal |   |
| CLIBASIA_01555 | hemolysin                     |   |   |   |        |   |   |        | + | + | Normal |   |

Note: Normal indicates that the phenotypes of transgenic plants are same as wild type plants. WB: Western blot. SDE: Sec-dependent effector. Y: indicates presence of Sec-secretion signal. “+” indicates presence. “-” indicates absence.

**Table S2: Transcriptomic studies of sweet orange in response to CLas infection that were used for GO enrichment analysis in this study**

| Study | Genotype     | Number of samples                                                               | Tissue          | Time after CLas infection | Repository number                          | Sequencing method | Analysis method | Analysis statistic              | Condition  | Reference                             |
|-------|--------------|---------------------------------------------------------------------------------|-----------------|---------------------------|--------------------------------------------|-------------------|-----------------|---------------------------------|------------|---------------------------------------|
| 1     | Valencia     | 6 (3 healthy + 3 HLB)                                                           | Stem            | 16 months                 | GSE33004                                   | Microarray        | Limma R Package | Unadjusted $P < 0.05$<br>FC > 2 | greenhouse | Aritua et al., 2013 <sup>4</sup>      |
| 2     | Valencia     | 5 (2 healthy + 3 HLB)                                                           | Leaf            | 5-9 weeks                 | GSE33459                                   | Microarray        | Limma R Package | Unadjusted $P < 0.05$<br>FC > 2 | greenhouse | Albrecht et al., 2008 <sup>5</sup>    |
| 3     | Valencia     | 5 (2 healthy + 3 HLB)                                                           | Leaf            | 13-17 weeks               | GSE33459                                   | Microarray        | Limma R Package | Unadjusted $P < 0.05$<br>FC > 2 | greenhouse | Albrecht et al., 2008 <sup>5</sup>    |
| 4     | Sweet orange | 6 (3 healthy + 3 HLB)                                                           | Leaf            | 8 months                  | GSE33003                                   | Microarray        | Limma R Package | Unadjusted $P < 0.05$<br>FC > 2 | greenhouse | Kim et al., 2009 <sup>6</sup>         |
| 5     | Madam Vinous | 6 (3 healthy + 3 HLB)                                                           | Leaf            | 7 months                  | GSE29633                                   | Microarray        | Limma R Package | Unadjusted $P < 0.05$<br>FC > 2 | greenhouse | Fan et al., 2011 <sup>7</sup>         |
| 6     | Madam Vinous | 6 (3 healthy + 3 HLB)                                                           | Leaf            | 5 weeks                   | Not available. Data within the manuscript. | Microarray        | Limma R Package | Unadjusted $P < 0.05$<br>FC > 2 | greenhouse | Fan et al., 2012 <sup>8</sup>         |
| 7     | Madam Vinous | 6 (3 healthy + 3 HLB)                                                           | Leaf            | 17 weeks                  | Not available. Data within the manuscript. | Microarray        | Limma R Package | Unadjusted $P < 0.05$<br>FC > 2 | greenhouse | Fan et al., 2012 <sup>8</sup>         |
| 8     | Madam Vinous | 6 (3 healthy + 3 HLB)                                                           | Leaf            | 27 weeks                  | Not available. Data within the manuscript. | Microarray        | Limma R Package | Unadjusted $P < 0.05$<br>FC > 2 | greenhouse | Fan et al., 2012 <sup>8</sup>         |
| 9     | Hamlin       | 8 (4 healthy + 4 HLB)                                                           | juice vesicles  | –                         | GSE33373                                   | Microarray        | Limma R Package | Unadjusted $P < 0.05$<br>FC > 2 | Field      | Liao et al., 2012 <sup>9</sup>        |
| 10    | Hamlin       | 8 (4 healthy + 4 HLB)                                                           | vascular tissue | –                         | GSE33373                                   | Microarray        | Limma R Package | Unadjusted $P < 0.05$<br>FC > 2 | Field      | Liao et al., 2012 <sup>9</sup>        |
| 11    | Hamlin       | 8 (4 healthy + 4 HLB)                                                           | flavedo         | –                         | GSE33373                                   | Microarray        | Limma R Package | Unadjusted $P < 0.05$<br>FC > 2 | Field      | Liao et al., 2012 <sup>9</sup>        |
| 12    | Hamlin       | 8 (4 healthy + 4 HLB)                                                           | Seed            | –                         | GSE33373                                   | Microarray        | Limma R Package | Unadjusted $P < 0.05$<br>FC > 2 | Field      | Liao et al., 2012 <sup>9</sup>        |
| 13    | Valencia     | 8 (4 healthy + 4 HLB)                                                           | juice vesicles  | –                         | GSE33373                                   | Microarray        | Limma R Package | Unadjusted $P < 0.05$<br>FC > 2 | Field      | Liao et al., 2012 <sup>9</sup>        |
| 14    | Valencia     | 8 (4 healthy + 4 HLB)                                                           | vascular tissue | –                         | GSE33373                                   | Microarray        | Limma R Package | Unadjusted $P < 0.05$<br>FC > 2 | Field      | Liao et al., 2012 <sup>9</sup>        |
| 15    | Valencia     | 8 (4 healthy + 4 HLB)                                                           | flavedo         | –                         | GSE33373                                   | Microarray        | Limma R Package | Unadjusted $P < 0.05$<br>FC > 2 | Field      | Liao et al., 2012 <sup>9</sup>        |
| 16    | Valencia     | 10 (5 healthy + 5 HLB), biologic replicates merged as one sample for each group | Immature fruit  | –                         | SRP022979                                  | RNA-seq           | DESeq           | Adjusted $P < 0.05$<br>FC > 2   | Field      | Martinelli et al., 2013 <sup>10</sup> |

|    |              |                                                                                 |                |         |                                            |         |        |                               |            |                                       |
|----|--------------|---------------------------------------------------------------------------------|----------------|---------|--------------------------------------------|---------|--------|-------------------------------|------------|---------------------------------------|
| 17 | Valencia     | 10 (5 healthy + 5 HLB), biologic replicates merged as one sample for each group | Mature fruit   | –       | SRP022979                                  | RNA-seq | DESeq  | Adjusted $P < 0.05$<br>FC > 2 | Field      | Martinelli et al., 2013 <sup>10</sup> |
| 18 | Hamlin       | 4(2 healthy+2 HLB)                                                              | Dropped fruit  | –       | GSE101381                                  | RNA-seq | DESeq2 | Adjusted $P < 0.05$<br>FC > 2 | Field      | Zhao et al., 2019 <sup>11</sup>       |
| 19 | Hamlin       | 4(2 healthy+2 HLB)                                                              | Retained fruit | –       | GSE101381                                  | RNA-seq | DESeq2 | Adjusted $P < 0.05$<br>FC > 2 | Field      | Zhao et al., 2019 <sup>11</sup>       |
| 20 | Madam Vinous | 6 (3 healthy + 3 HLB)                                                           | Leaf           | 7 weeks | Not available. Data within the manuscript. | RNA-seq | DESeq  | Adjusted $P < 0.05$<br>FC > 2 | greenhouse | Yu et al., 2017 <sup>12</sup>         |

**Table S3: GO enrichment analysis of DEGs of *Citrus sinensis* in response to CLas infection based on nine different studies as specified in Table S2**

| GO_acc     | Term type | Term                                                                                                  | Query item | Bg item | p-value  | FDR      |
|------------|-----------|-------------------------------------------------------------------------------------------------------|------------|---------|----------|----------|
| GO:0044464 | C         | cell part                                                                                             | 880        | 1618    | 1.60E-49 | 3.20E-47 |
| GO:0005623 | C         | cell                                                                                                  | 880        | 1618    | 1.60E-49 | 3.20E-47 |
| GO:0044262 | P         | cellular carbohydrate metabolic process                                                               | 92         | 111     | 2.70E-12 | 6.00E-09 |
| GO:0005506 | F         | iron ion binding                                                                                      | 185        | 342     | 2.40E-10 | 3.70E-07 |
| GO:0003700 | F         | transcription factor activity                                                                         | 174        | 342     | 2.40E-08 | 1.80E-05 |
| GO:0003677 | F         | DNA binding                                                                                           | 351        | 852     | 4.20E-07 | 0.00016  |
| GO:0003824 | F         | catalytic activity                                                                                    | 2022       | 6096    | 4.20E-07 | 0.00016  |
| GO:0016491 | F         | oxidoreductase activity                                                                               | 492        | 1277    | 1.20E-06 | 0.00036  |
| GO:0043169 | F         | cation binding                                                                                        | 529        | 1398    | 2.50E-06 | 0.00062  |
| GO:0046872 | F         | metal ion binding                                                                                     | 524        | 1392    | 4.40E-06 | 0.00095  |
| GO:0008152 | P         | metabolic process                                                                                     | 2064       | 6289    | 4.00E-06 | 0.0029   |
| GO:0009987 | P         | cellular process                                                                                      | 1587       | 4729    | 3.80E-06 | 0.0029   |
| GO:0055114 | P         | oxidation reduction                                                                                   | 443        | 1155    | 6.20E-06 | 0.0034   |
| GO:0016879 | F         | ligase activity, forming carbon-nitrogen bonds                                                        | 37         | 47      | 1.90E-05 | 0.0036   |
| GO:0043565 | F         | sequence-specific DNA binding                                                                         | 91         | 174     | 2.30E-05 | 0.0039   |
| GO:0046914 | F         | transition metal ion binding                                                                          | 378        | 983     | 2.60E-05 | 0.004    |
| GO:0042221 | P         | response to chemical stimulus                                                                         | 84         | 159     | 3.50E-05 | 0.015    |
| GO:0020037 | F         | heme binding                                                                                          | 165        | 396     | 0.00034  | 0.036    |
| GO:0016705 | F         | oxidoreductase activity, acting on paired donors, with incorporation or reduction of molecular oxygen | 144        | 335     | 0.00028  | 0.036    |
| GO:0046906 | F         | tetrapyrrole binding                                                                                  | 165        | 396     | 0.00034  | 0.036    |
| GO:0043167 | F         | ion binding                                                                                           | 529        | 1481    | 0.00029  | 0.036    |
| GO:0005996 | P         | monosaccharide metabolic process                                                                      | 23         | 25      | 0.00015  | 0.045    |
| GO:0019318 | P         | hexose metabolic process                                                                              | 22         | 23      | 0.00015  | 0.045    |
| GO:0005976 | P         | polysaccharide metabolic process                                                                      | 47         | 77      | 0.00016  | 0.045    |

Notes: The *P* value was determined using Fisher's exact test method and corrected using the FDR method.

## References and Notes

- 1 Pang, Z. *et al.* Citrus CsACD2 Is a Target of *Candidatus Liberibacter Asiaticus* in Huanglongbing Disease. *Plant Physiol* **184**, 792-805, doi:10.1104/pp.20.00348 (2020).
- 2 Clark, K. *et al.* An effector from the Huanglongbing-associated pathogen targets citrus proteases. *Nat Commun* **9**, 1718, doi:10.1038/s41467-018-04140-9 (2018).
- 3 Li, J. *et al.* '*Candidatus Liberibacter asiaticus*' Encodes a Functional Salicylic Acid (SA) Hydroxylase That Degrades SA to Suppress Plant Defenses. *Mol Plant Microbe Interact* **30**, 620-630, doi:10.1094/MPMI-12-16-0257-R (2017).
- 4 Aritua, V., Achor, D., Gmitter, F. G., Albrigo, G. & Wang, N. Transcriptional and Microscopic Analyses of Citrus Stem and Root Responses to *Candidatus Liberibacter asiaticus* Infection. *PLoS One* **8**, e73742, doi:10.1371/journal.pone.0073742 (2013).
- 5 Albrecht, U. & Bowman, K. Gene expression in Citrus sinensis (L.) Osbeck following infection with the bacterial pathogen *Candidatus Liberibacter asiaticus* causing Huanglongbing in Florida. *PLANT SCIENCE* **175**, 291-306 (2008).
- 6 Kim, J. S., Sagaram, U. S., Burns, J. K., Li, J. L. & Wang, N. Response of sweet orange (*Citrus sinensis*) to '*Candidatus Liberibacter asiaticus*' infection: microscopy and microarray analyses. *Phytopathology* **99**, 50-57, doi:10.1094/PHYTO-99-1-0050 (2009).
- 7 Fan, J. *et al.* Comparative iTRAQ proteome and transcriptome analyses of sweet orange infected by "*Candidatus Liberibacter asiaticus*". *Physiol Plant* **143**, 235-245, doi:10.1111/j.1399-3054.2011.01502.x (2011).
- 8 Fan, J. *et al.* Comparative transcriptional and anatomical analyses of tolerant rough lemon and susceptible sweet orange in response to '*Candidatus Liberibacter asiaticus*' infection. *Mol Plant Microbe Interact* **25**, 1396-1407, doi:10.1094/MPMI-06-12-0150-R (2012).
- 9 Liao, H. L. & Burns, J. K. Gene expression in Citrus sinensis fruit tissues harvested from huanglongbing-infected trees: comparison with girdled fruit. *J Exp Bot* **63**, 3307-3319, doi:10.1093/jxb/ers070 (2012).
- 10 Martinelli, F. *et al.* Gene regulatory networks elucidating huanglongbing disease mechanisms. *PLoS One* **8**, e74256, doi:10.1371/journal.pone.0074256 (2013).
- 11 Zhao, W., Baldwin, E. A., Bai, J., Plotto, A. & Irey, M. Comparative analysis of the transcriptomes of the calyx abscission zone of sweet orange insights into the huanglongbing-associated fruit abscission. *Hortic Res* **6**, 71, doi:10.1038/s41438-019-0152-4 (2019).
- 12 Yu, Q. *et al.* Reprogramming of a defense signaling pathway in rough lemon and sweet orange is a critical element of the early response to '*Candidatus Liberibacter asiaticus*'. *Hortic Res* **4**, 17063, doi:10.1038/hortres.2017.63 (2017).

**Fig. S1. Temporal expression of immune-related genes in response to CLas infection of young flush of *C. sinensis*.** The reverse transcription-quantitative PCR (RT-qPCR) analysis was conducted using young leaves from three two-year-old HLB positive Valencia sweet orange trees compared with that of three healthy Valencia trees with one tree as one biological replicate. Experiments were repeated two times with similar results and representative results are shown. Data shown are mean  $\pm$  SEM, n=3.

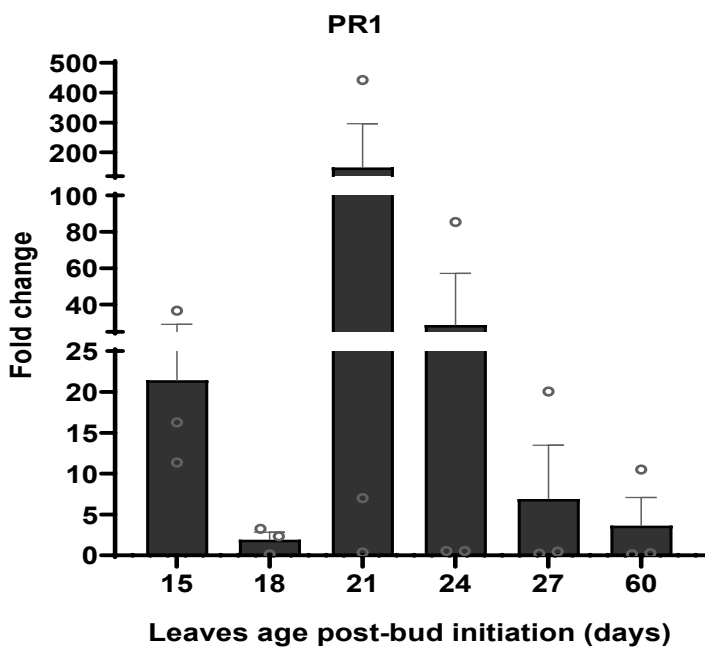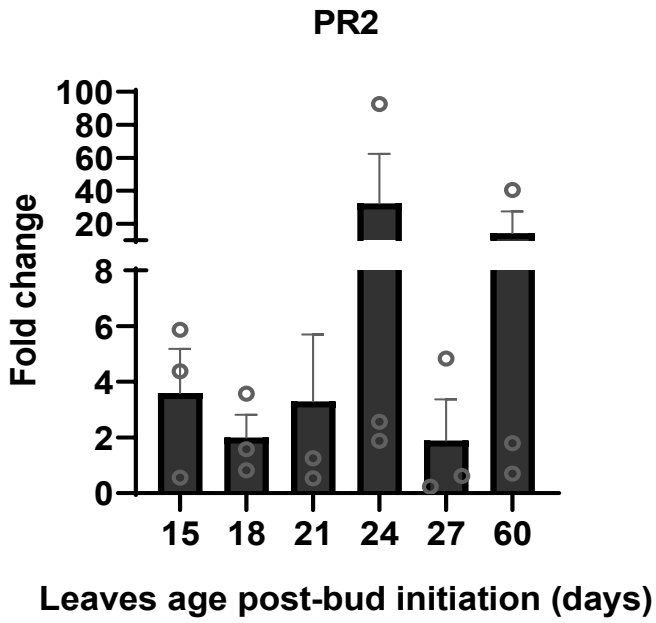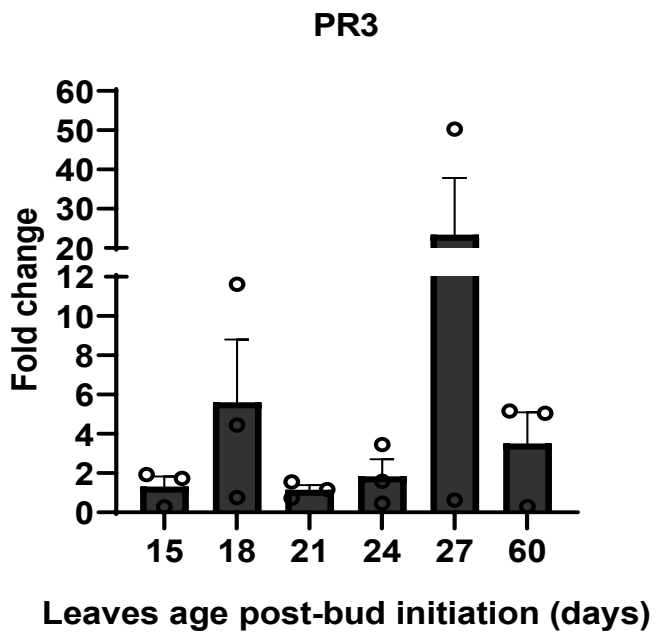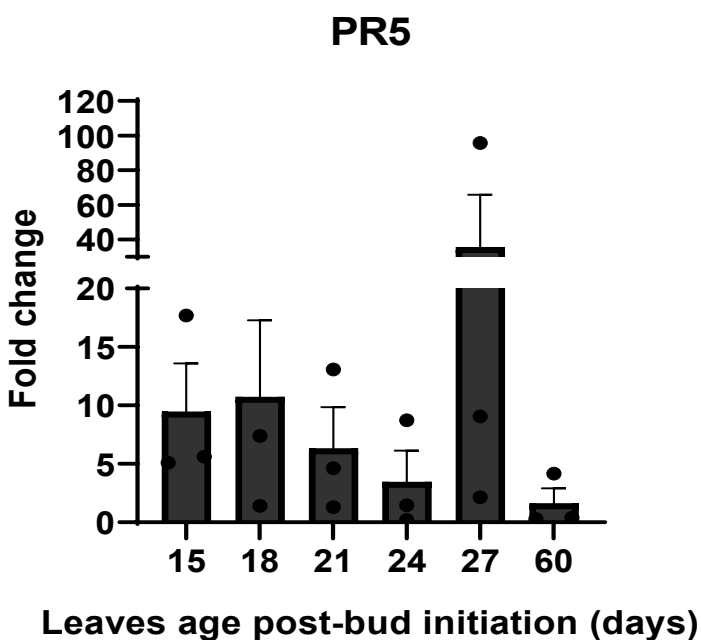

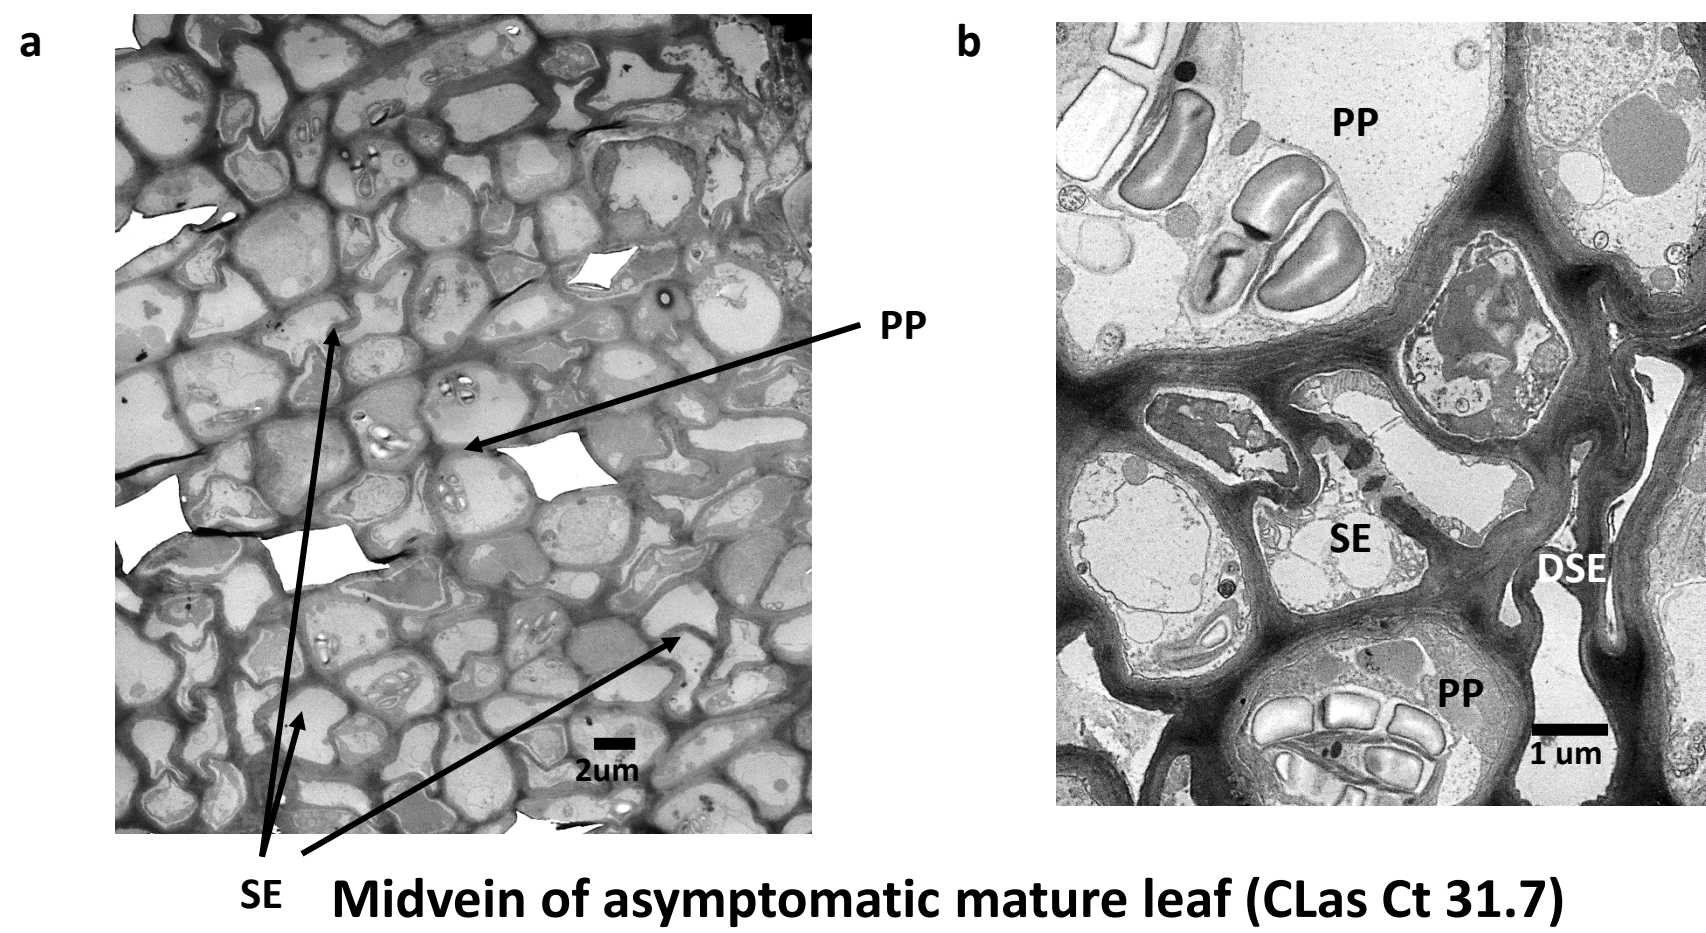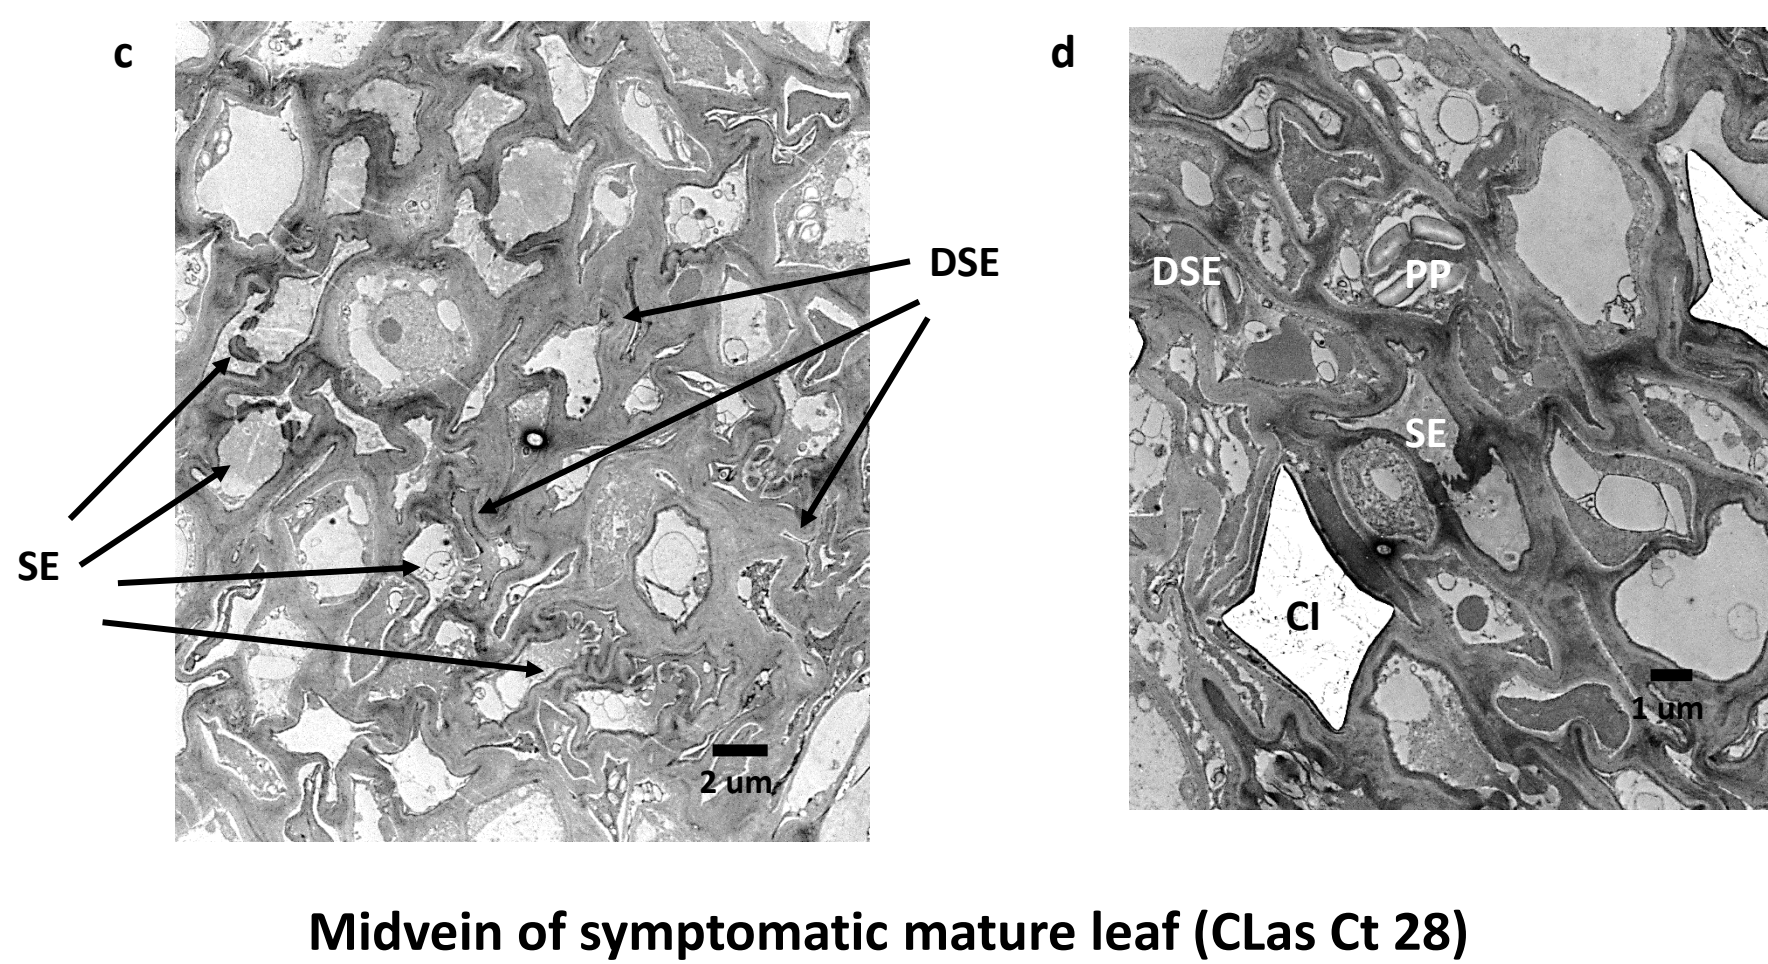

**Fig. S2. TEM observation of the midribs of mature leaves of *C. sinensis* trees grown in the field that are HLB positive.** (a and b) Midvein of asymptomatic mature leaf. (c and d) Midvein of symptomatic mature leaf. CLas titers were indicated by Ct values for the samples used. Scale bar for each picture is included. SE: sieve element. DSE: dead sieve element cells. PP: parenchyma cells. CI: calcium oxalate crystal idioblasts.



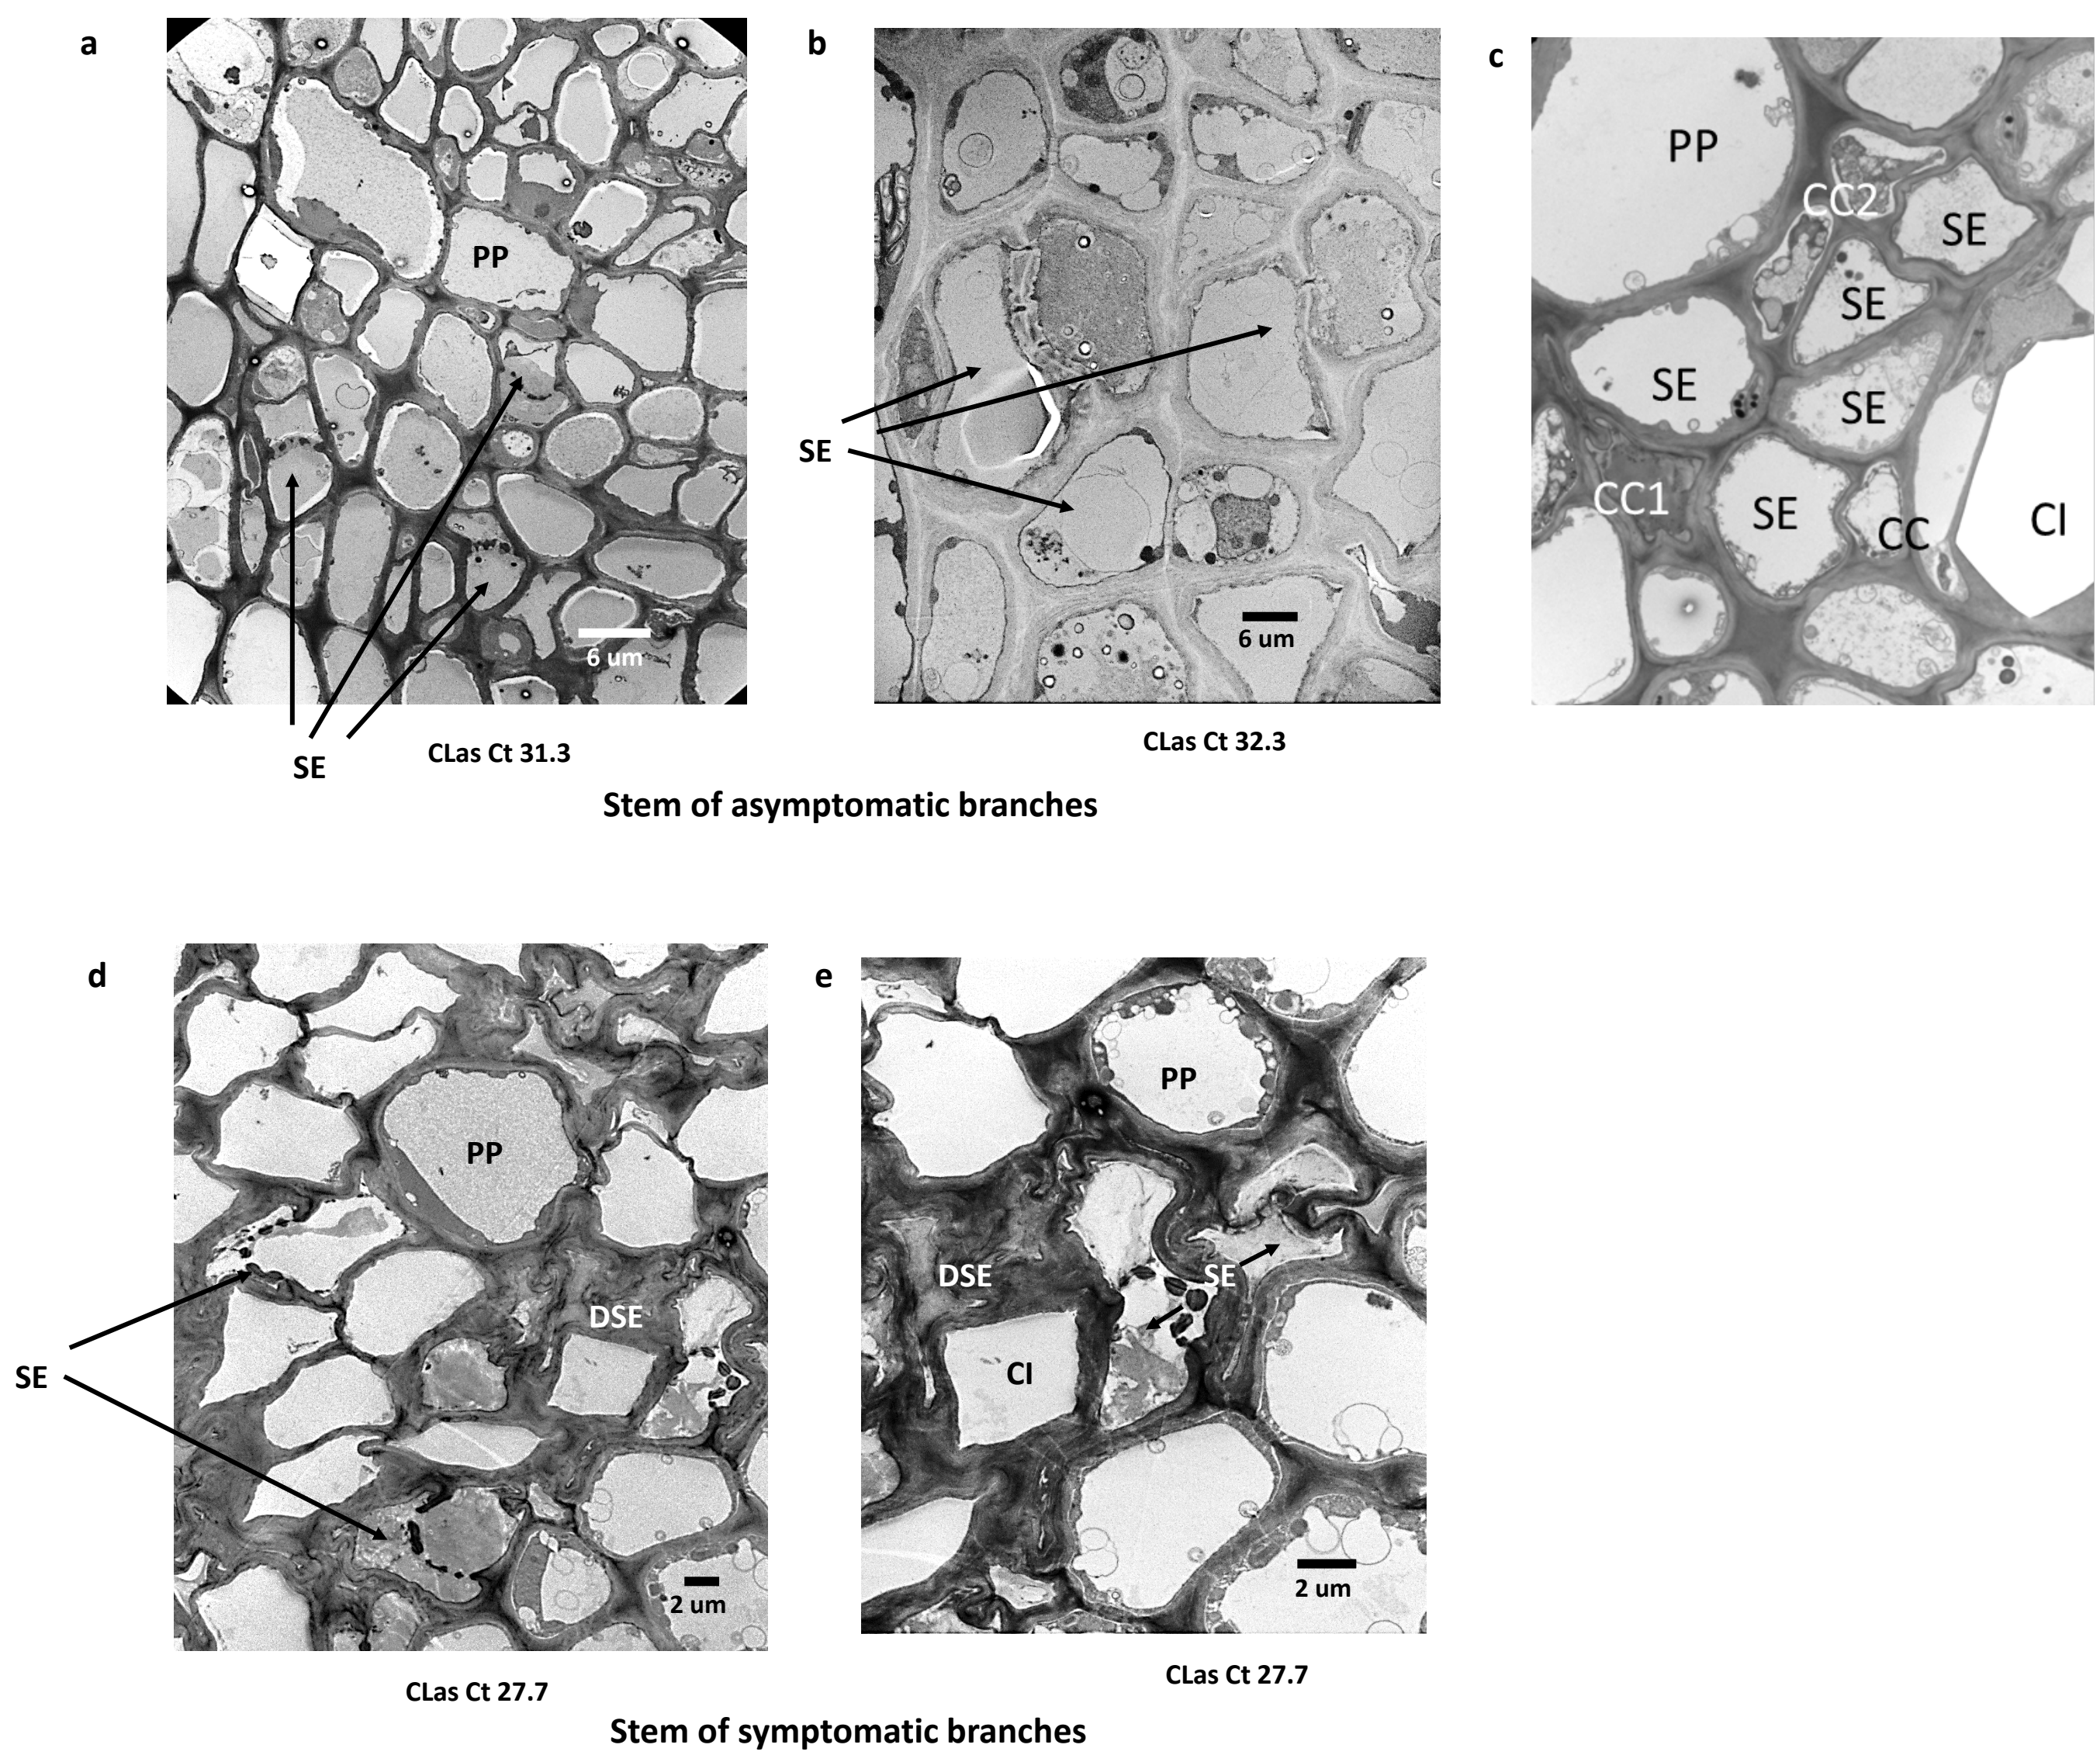

**Fig. S3. TEM observation of the stem tissues of HLB positive *C. sinensis* trees grown in the field.** Stems were collected from branches without HLB symptoms (a, b and c) and branches with HLB symptoms (d and e). Scale bar for each picture is included. SE: sieve element. DSE: dead sieve element cells. PP: parenchyma cells. CI: calcium oxalate crystal idioblas. CLas titers in the tested samples were indicated by Ct values.

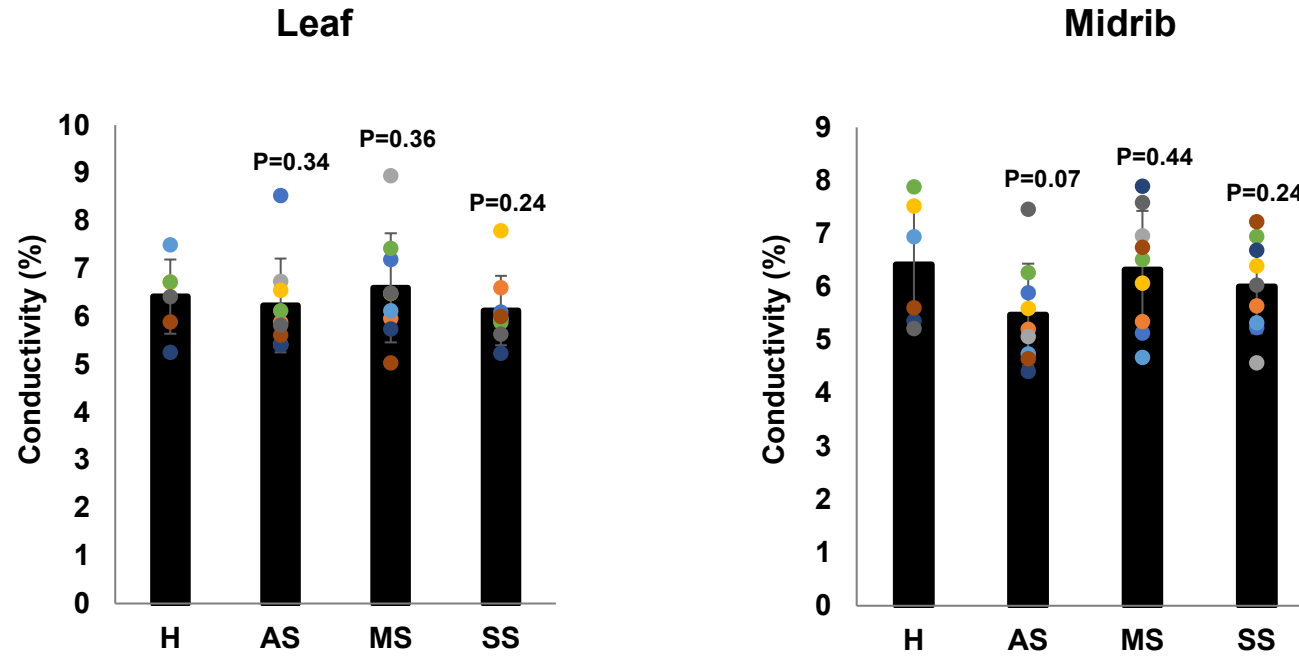

**Fig. S4. Comparison of ion leakage activities of leaves of CLAs-negative and CLAs-infected sweet orange trees.** H: healthy leaves. AS: asymptomatic leaves. MS: leaves with mild symptoms. SS: leaves with severe symptoms. Healthy leaves were collected from CLAs-free sweet orange plants. AS, MS, and SS were collected from CLAs positives sweet orange trees in the groves. For statistical significance tests, two tailed Student's t-test was conducted (n=9 for AS, MS and SS; n=6 for H). Mean and standard deviation are shown. P values for comparisons against CLAs negative samples were shown above each column. Experiments were repeated two times with similar results and representative results are shown. Source data are provided as a Source Data file.

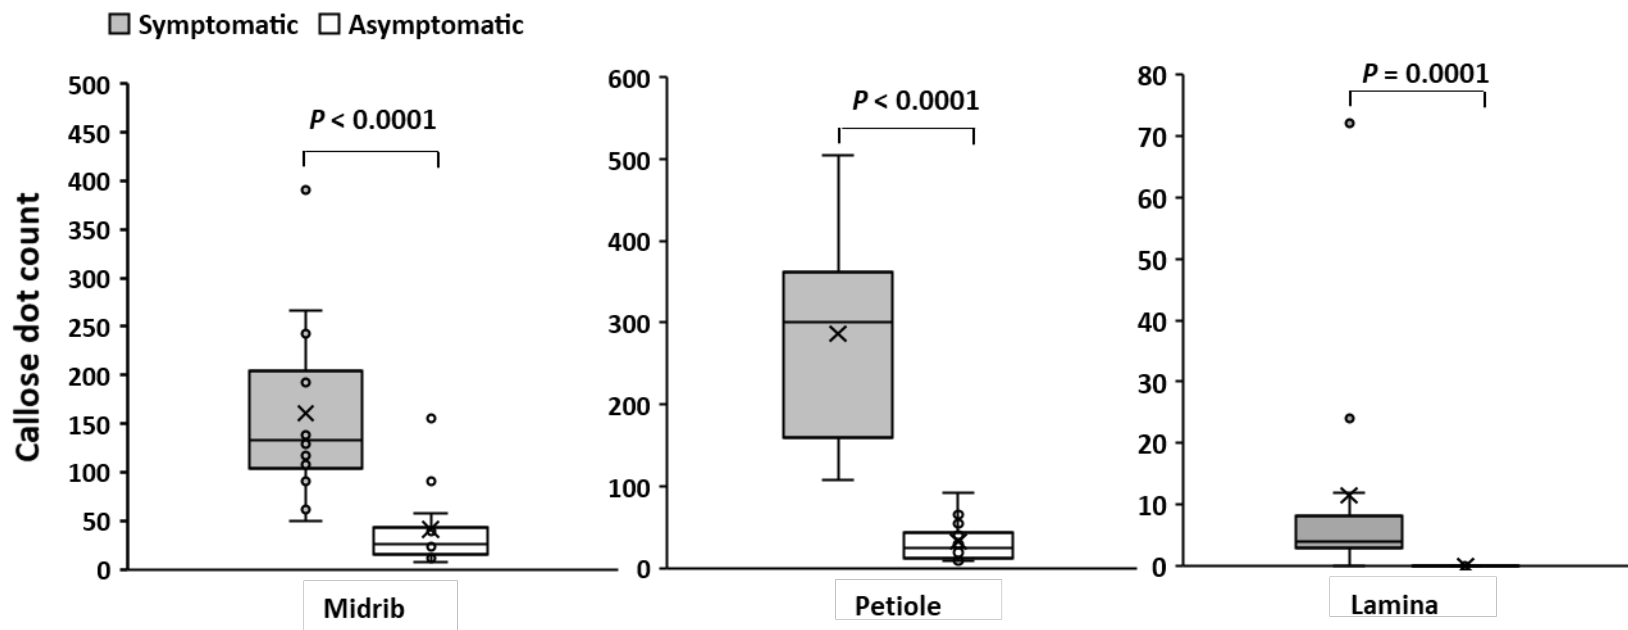

**Fig. S5. CLas infection induces callose deposition in phloem tissues of *C. sinensis*.** *C. sinensis* 'Hamlin' leaf samples were fixed with FAA solution overnight, sectioned and stained with 0.005% aniline blue solution prior to analysis. 12 representatives for each sample type were examined and callose dots were counted per slide area (24.75 mm<sup>2</sup>). Statistical analysis was performed using two-tailed Student's t test based on Log(x+1) transformed data. Box plots: central line represents the median, box edges delimit lower and upper quartiles, and dots above the boxes are outliers.

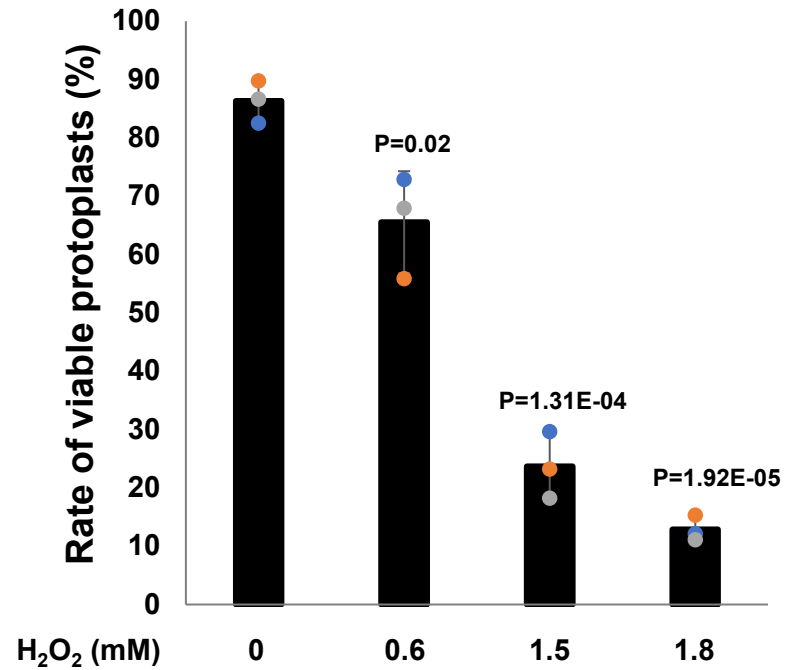

**Fig. S6.  $H_2O_2$  kills protoplast cells of *C. sinensis*.** Freshly prepared protoplast cells of *C. sinensis* were treated with different concentrations of  $H_2O_2$  for 24 h and tested for viability via fluorescein diacetate (FDA) staining. Each experiment contains three biological replicates. Mean and SD were shown. Statistical differences were analyzed using one way ANOVA with Bonferroni Correction. P values are labeled above column. Experiments were repeated two times with similar results and representative results are shown. Source data are provided as a Source Data file.

0 mM H<sub>2</sub>O<sub>2</sub>

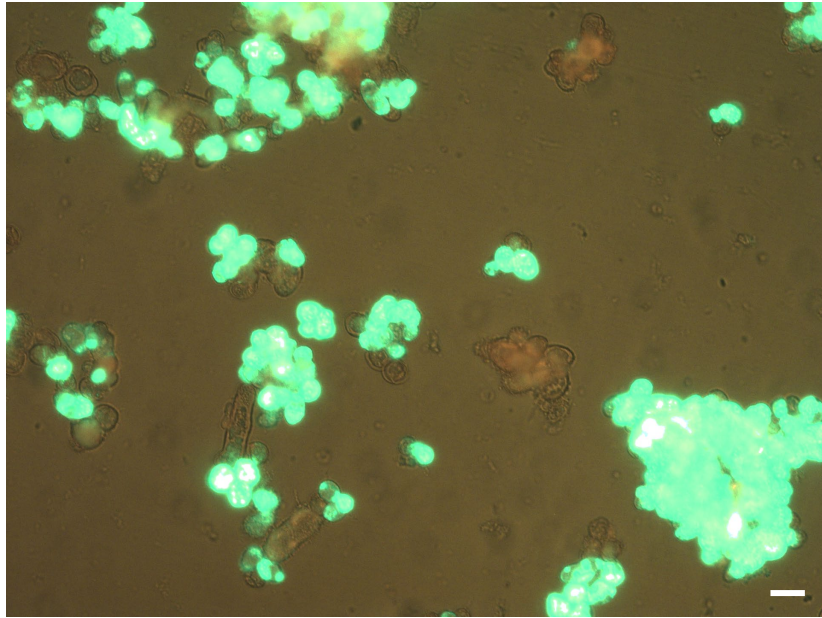

0.6 mM H<sub>2</sub>O<sub>2</sub>

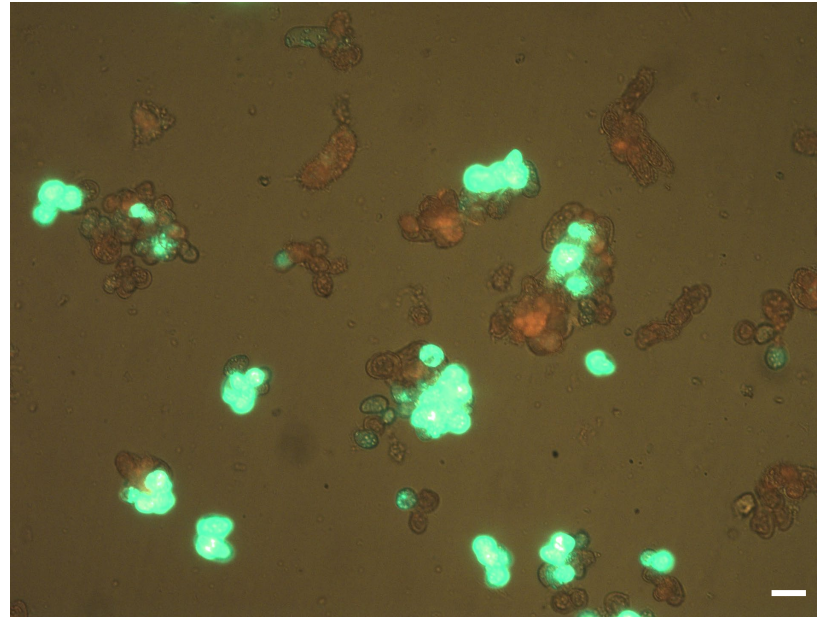

1.5 mM H<sub>2</sub>O<sub>2</sub>

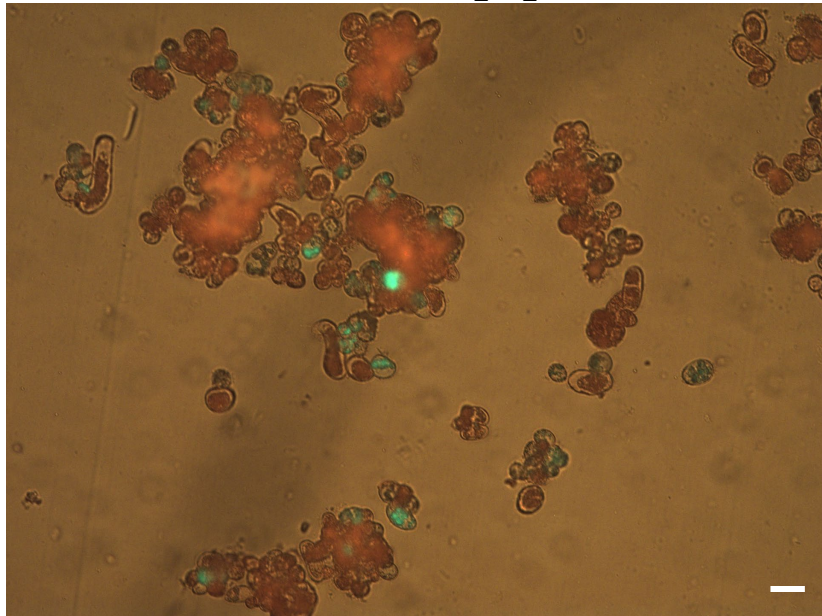

1.8 mM H<sub>2</sub>O<sub>2</sub>

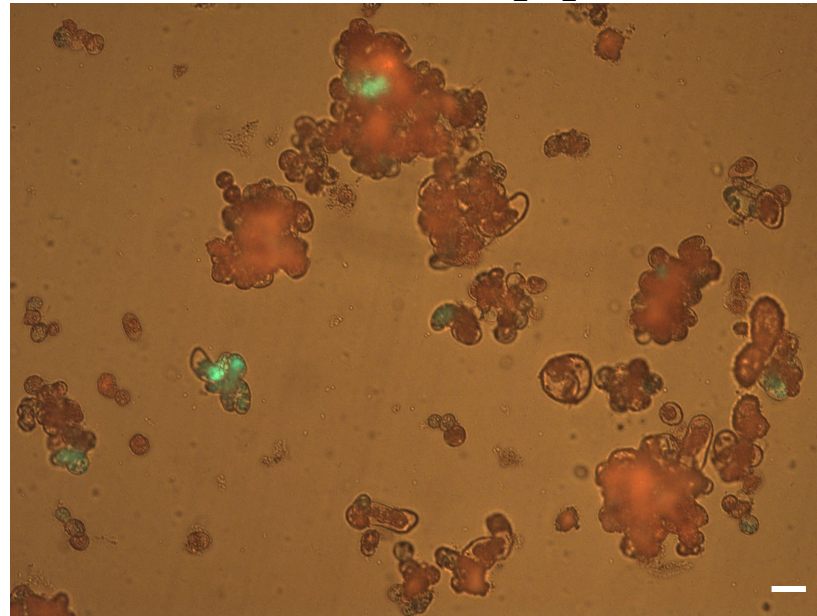

3.6 mM H<sub>2</sub>O<sub>2</sub>

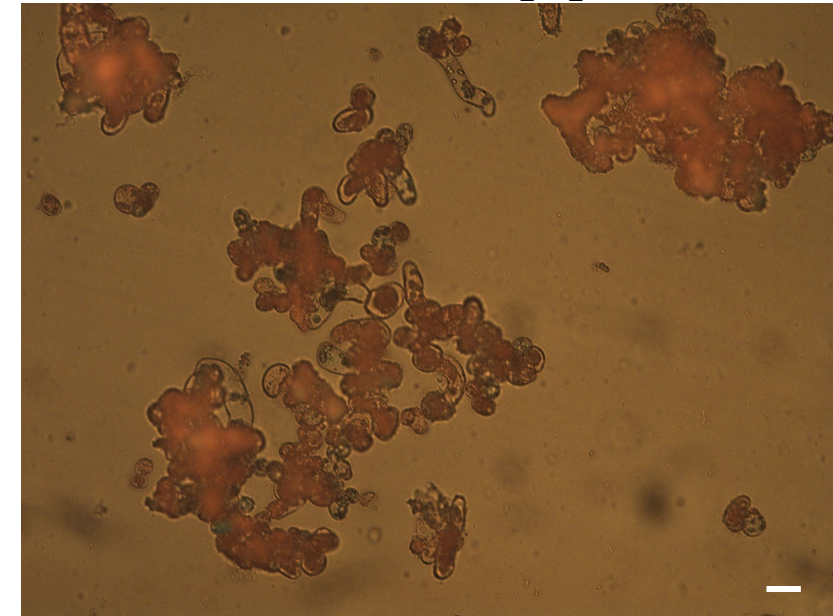

**Fig. S7. Viability of *Citrus sinensis* 'Hamlin' suspension culture cells treated with H<sub>2</sub>O<sub>2</sub>.** The suspension culture was treated with H<sub>2</sub>O<sub>2</sub> for 24 hours. Each sample was stained with fluorescein diacetate (stain only living cells, green color) and propidium iodide (stain only dead cells, orange to red color). Bar size, 20 mm. Representative pictures are shown.

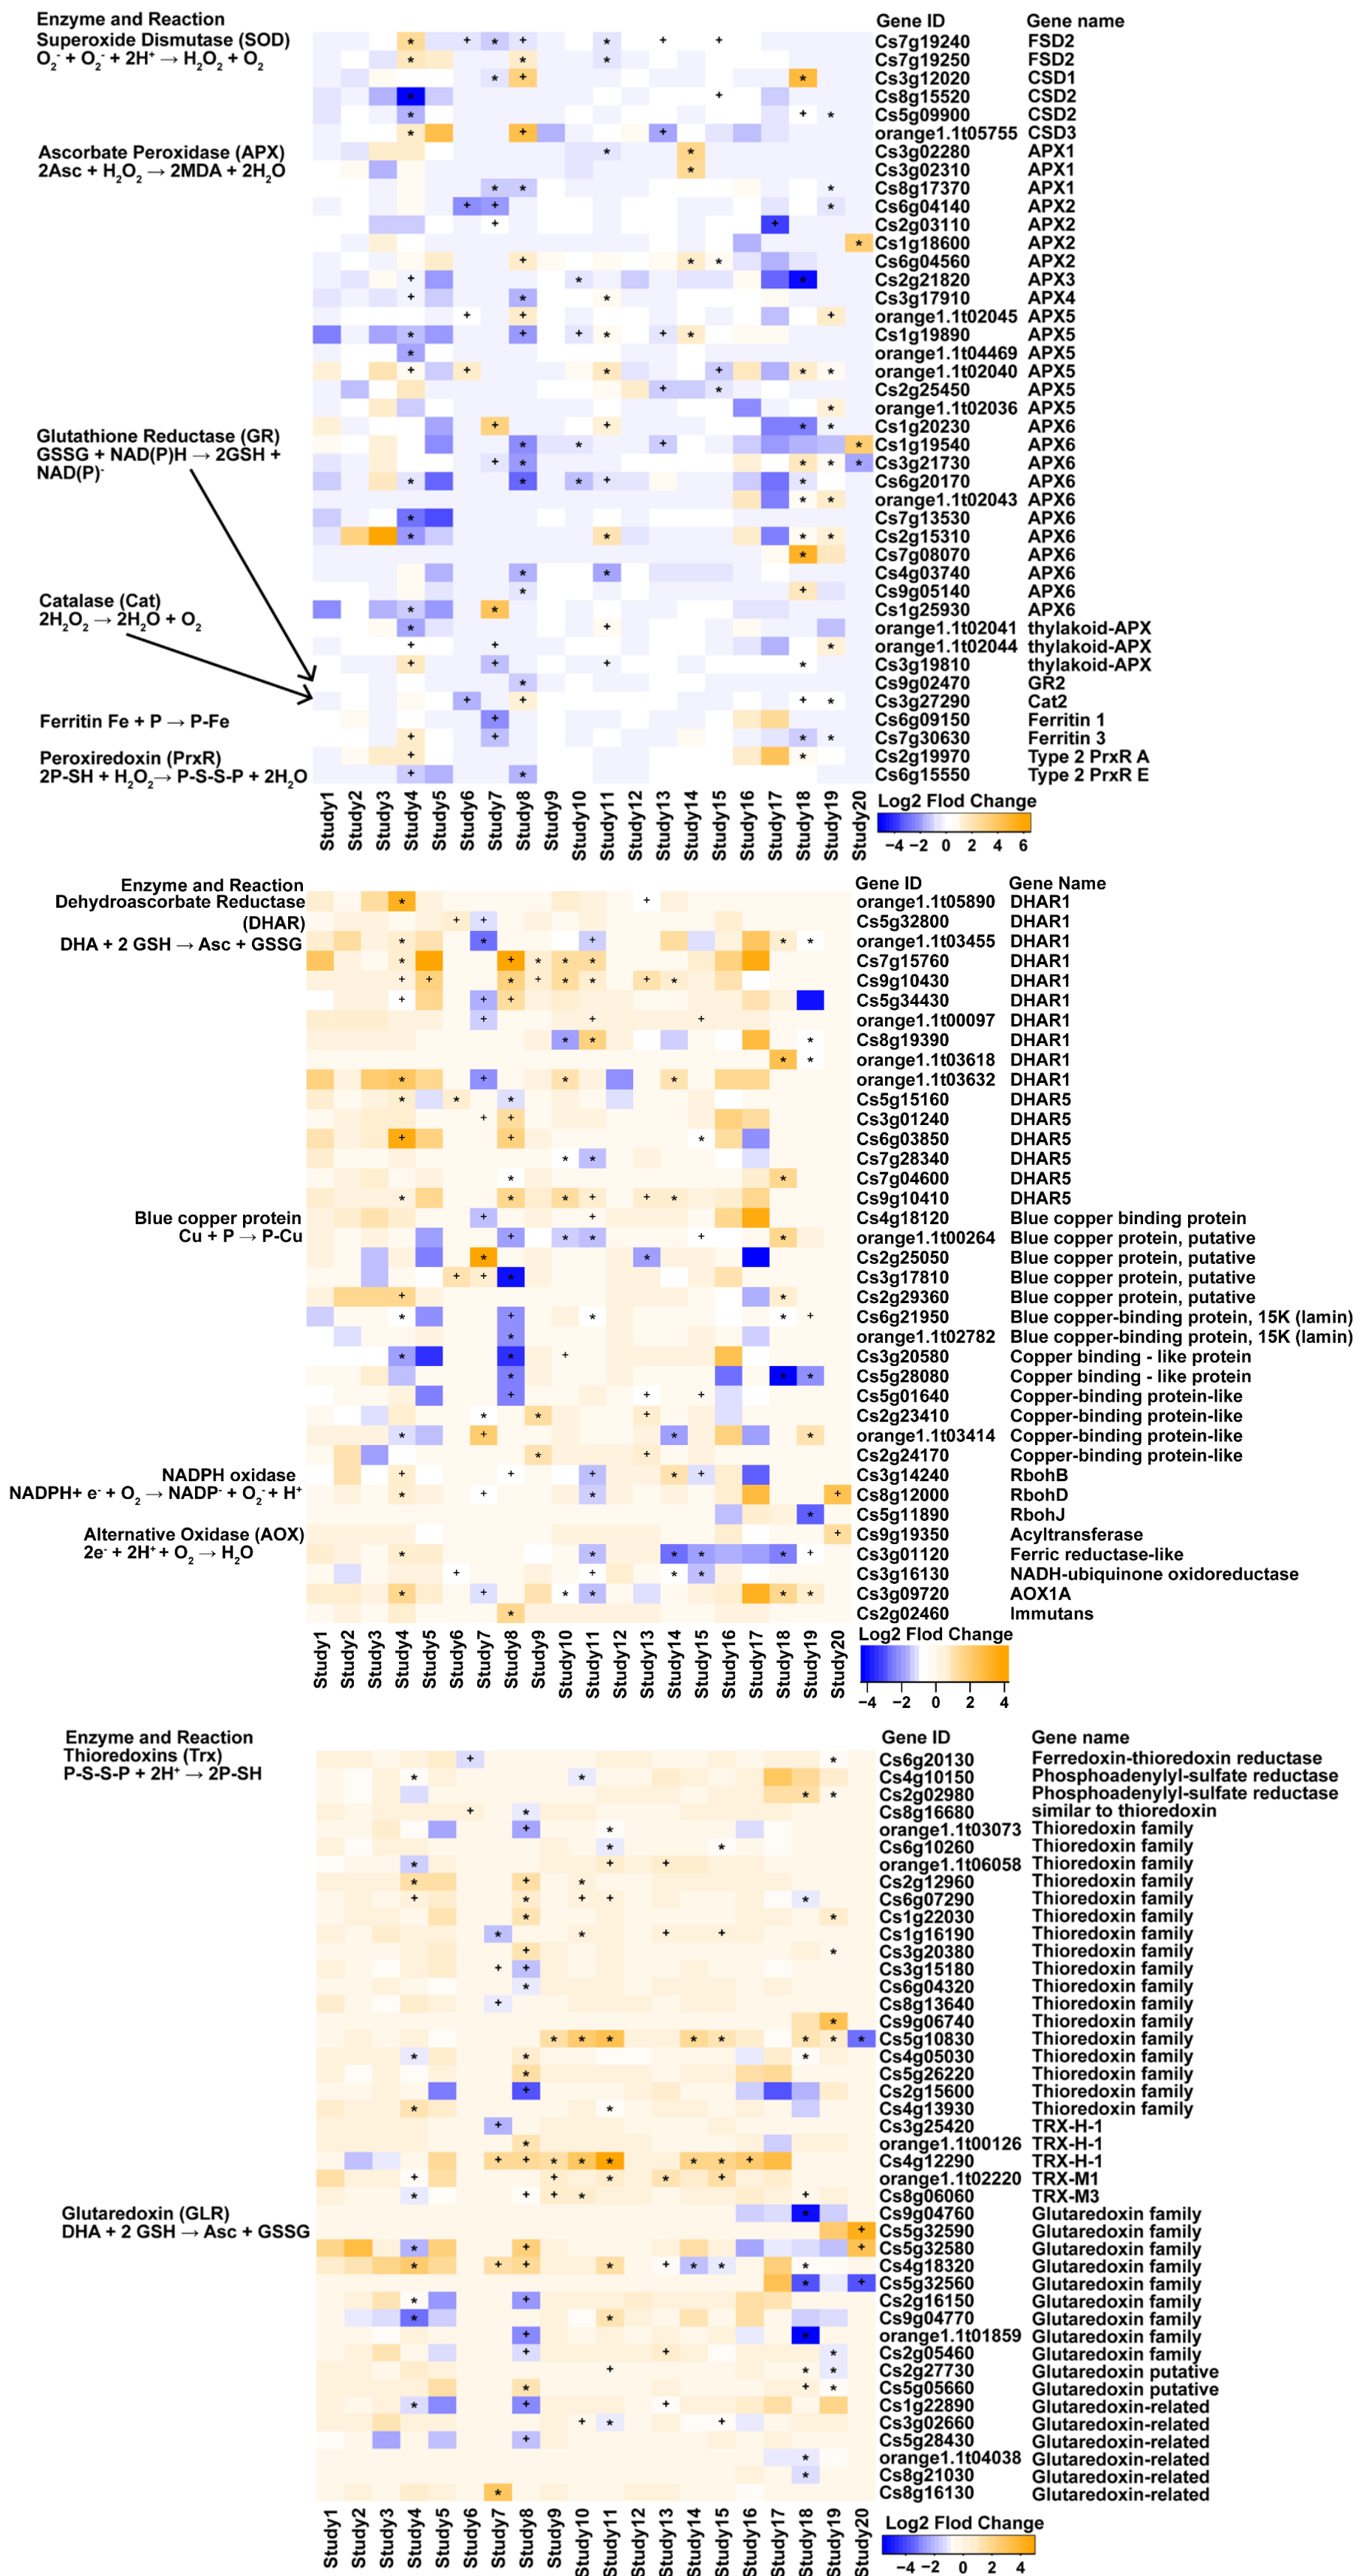

**Fig. S8. The expression profile of ROS-related genes in response to CLAs infection in 9 previous studies.** Affiliation of each gene is indicated in *brackets*. Orange denotes "higher in CLAs infected than CLAs negative samples" while blue denotes "higher in CLAs negative than CLAs infected samples". The asterisk denotes  $P$  value  $< 0.01$ ; the plus sign denotes  $P$  value  $< 0.05$ . The information about the 9 previous studies is listed in Table S2.

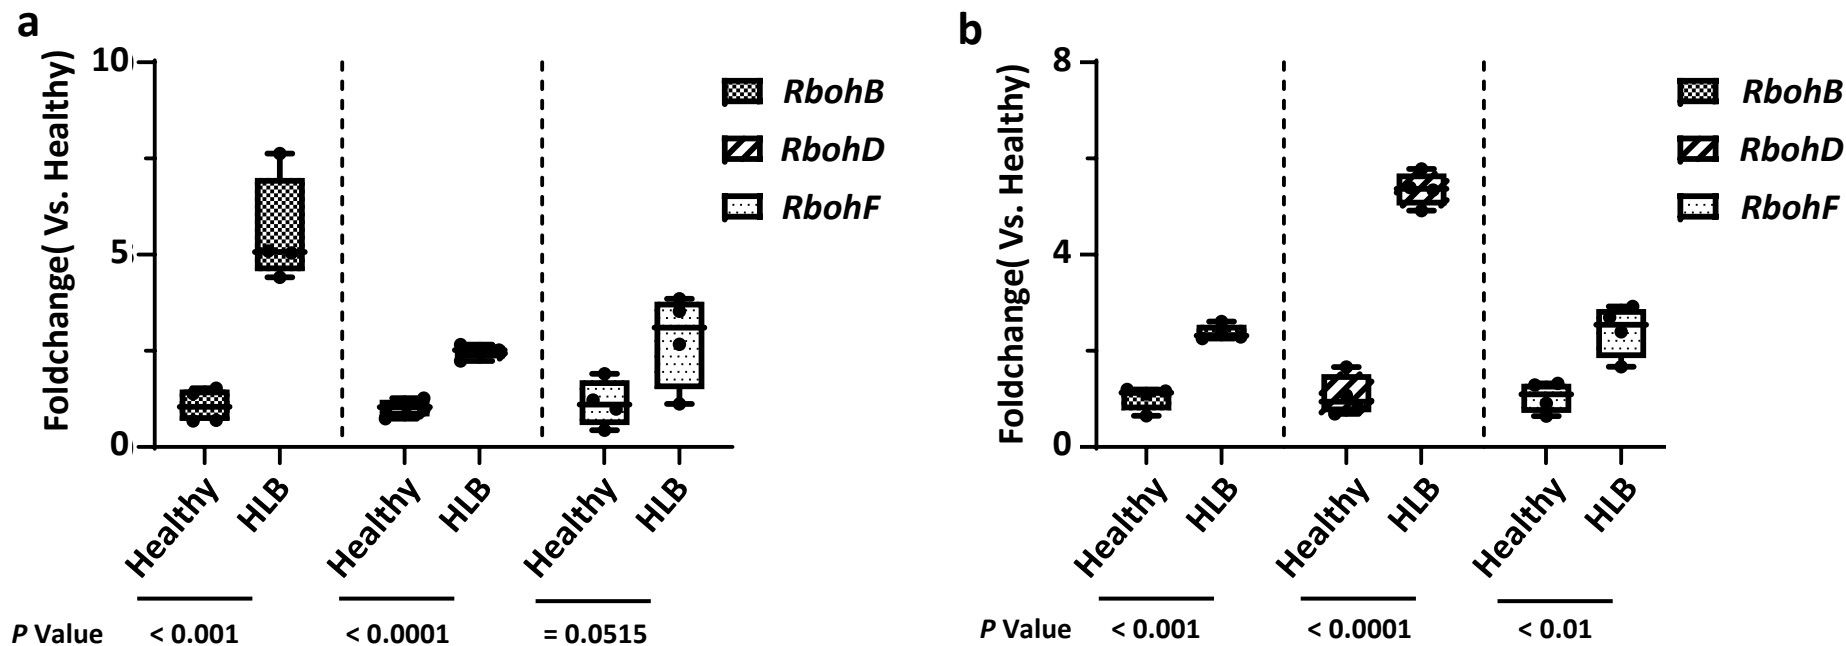

**Fig. S9. Expression of NADPH oxidase genes in response to CLas infection.** qRT-PCR analysis of *RBOHB*, *RBOHD*, and *RBOHF* in healthy and HLB positive sweet orange leaves. a. Samples collected from *C. sinensis* 'Valencia' trees grown in the greenhouse. b. Samples collected from *C. sinensis* 'Valencia' trees grown in the field. The housekeeping gene *GAPDH* encoding glyceraldehyde-3-phosphate dehydrogenase-C was used as an endogenous control. Box plots: central line represents the median, box edges delimit lower and upper quartiles, and dots represent the foldchange of each replicate (n=4). P value listed below was calculated by two-tailed Student's t-test. The experiments were repeated twice with similar results. Source data are provided as a Source Data file.

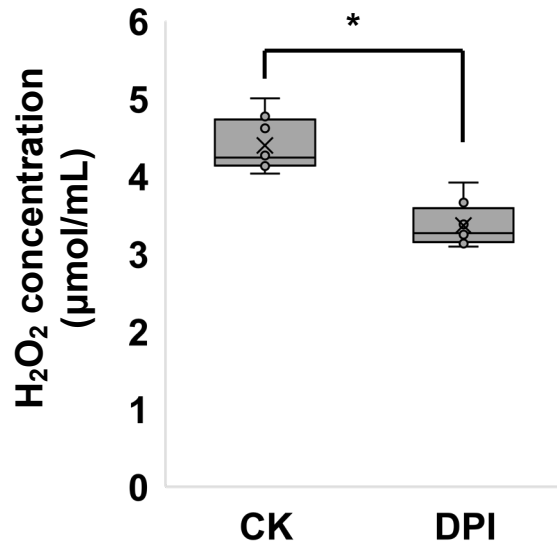

**Fig. S10. ROS levels in CLas-positive stems were reduced by NADPH oxidase inhibitor diphenyleneiodonium (DPI).** HLB positive branches from the summer flush of Valencia sweet orange in the field were collected and then soaked in DPI solution (25 µM) or water (control). After 48 h treatment, phloem-enriched bark tissues were collected for H<sub>2</sub>O<sub>2</sub> concentration measurement. Eight biological replicates were used for this test. \* indicates  $p < 0.01$  (two-tailed Student's t-test). The experiment was repeated twice with similar results.



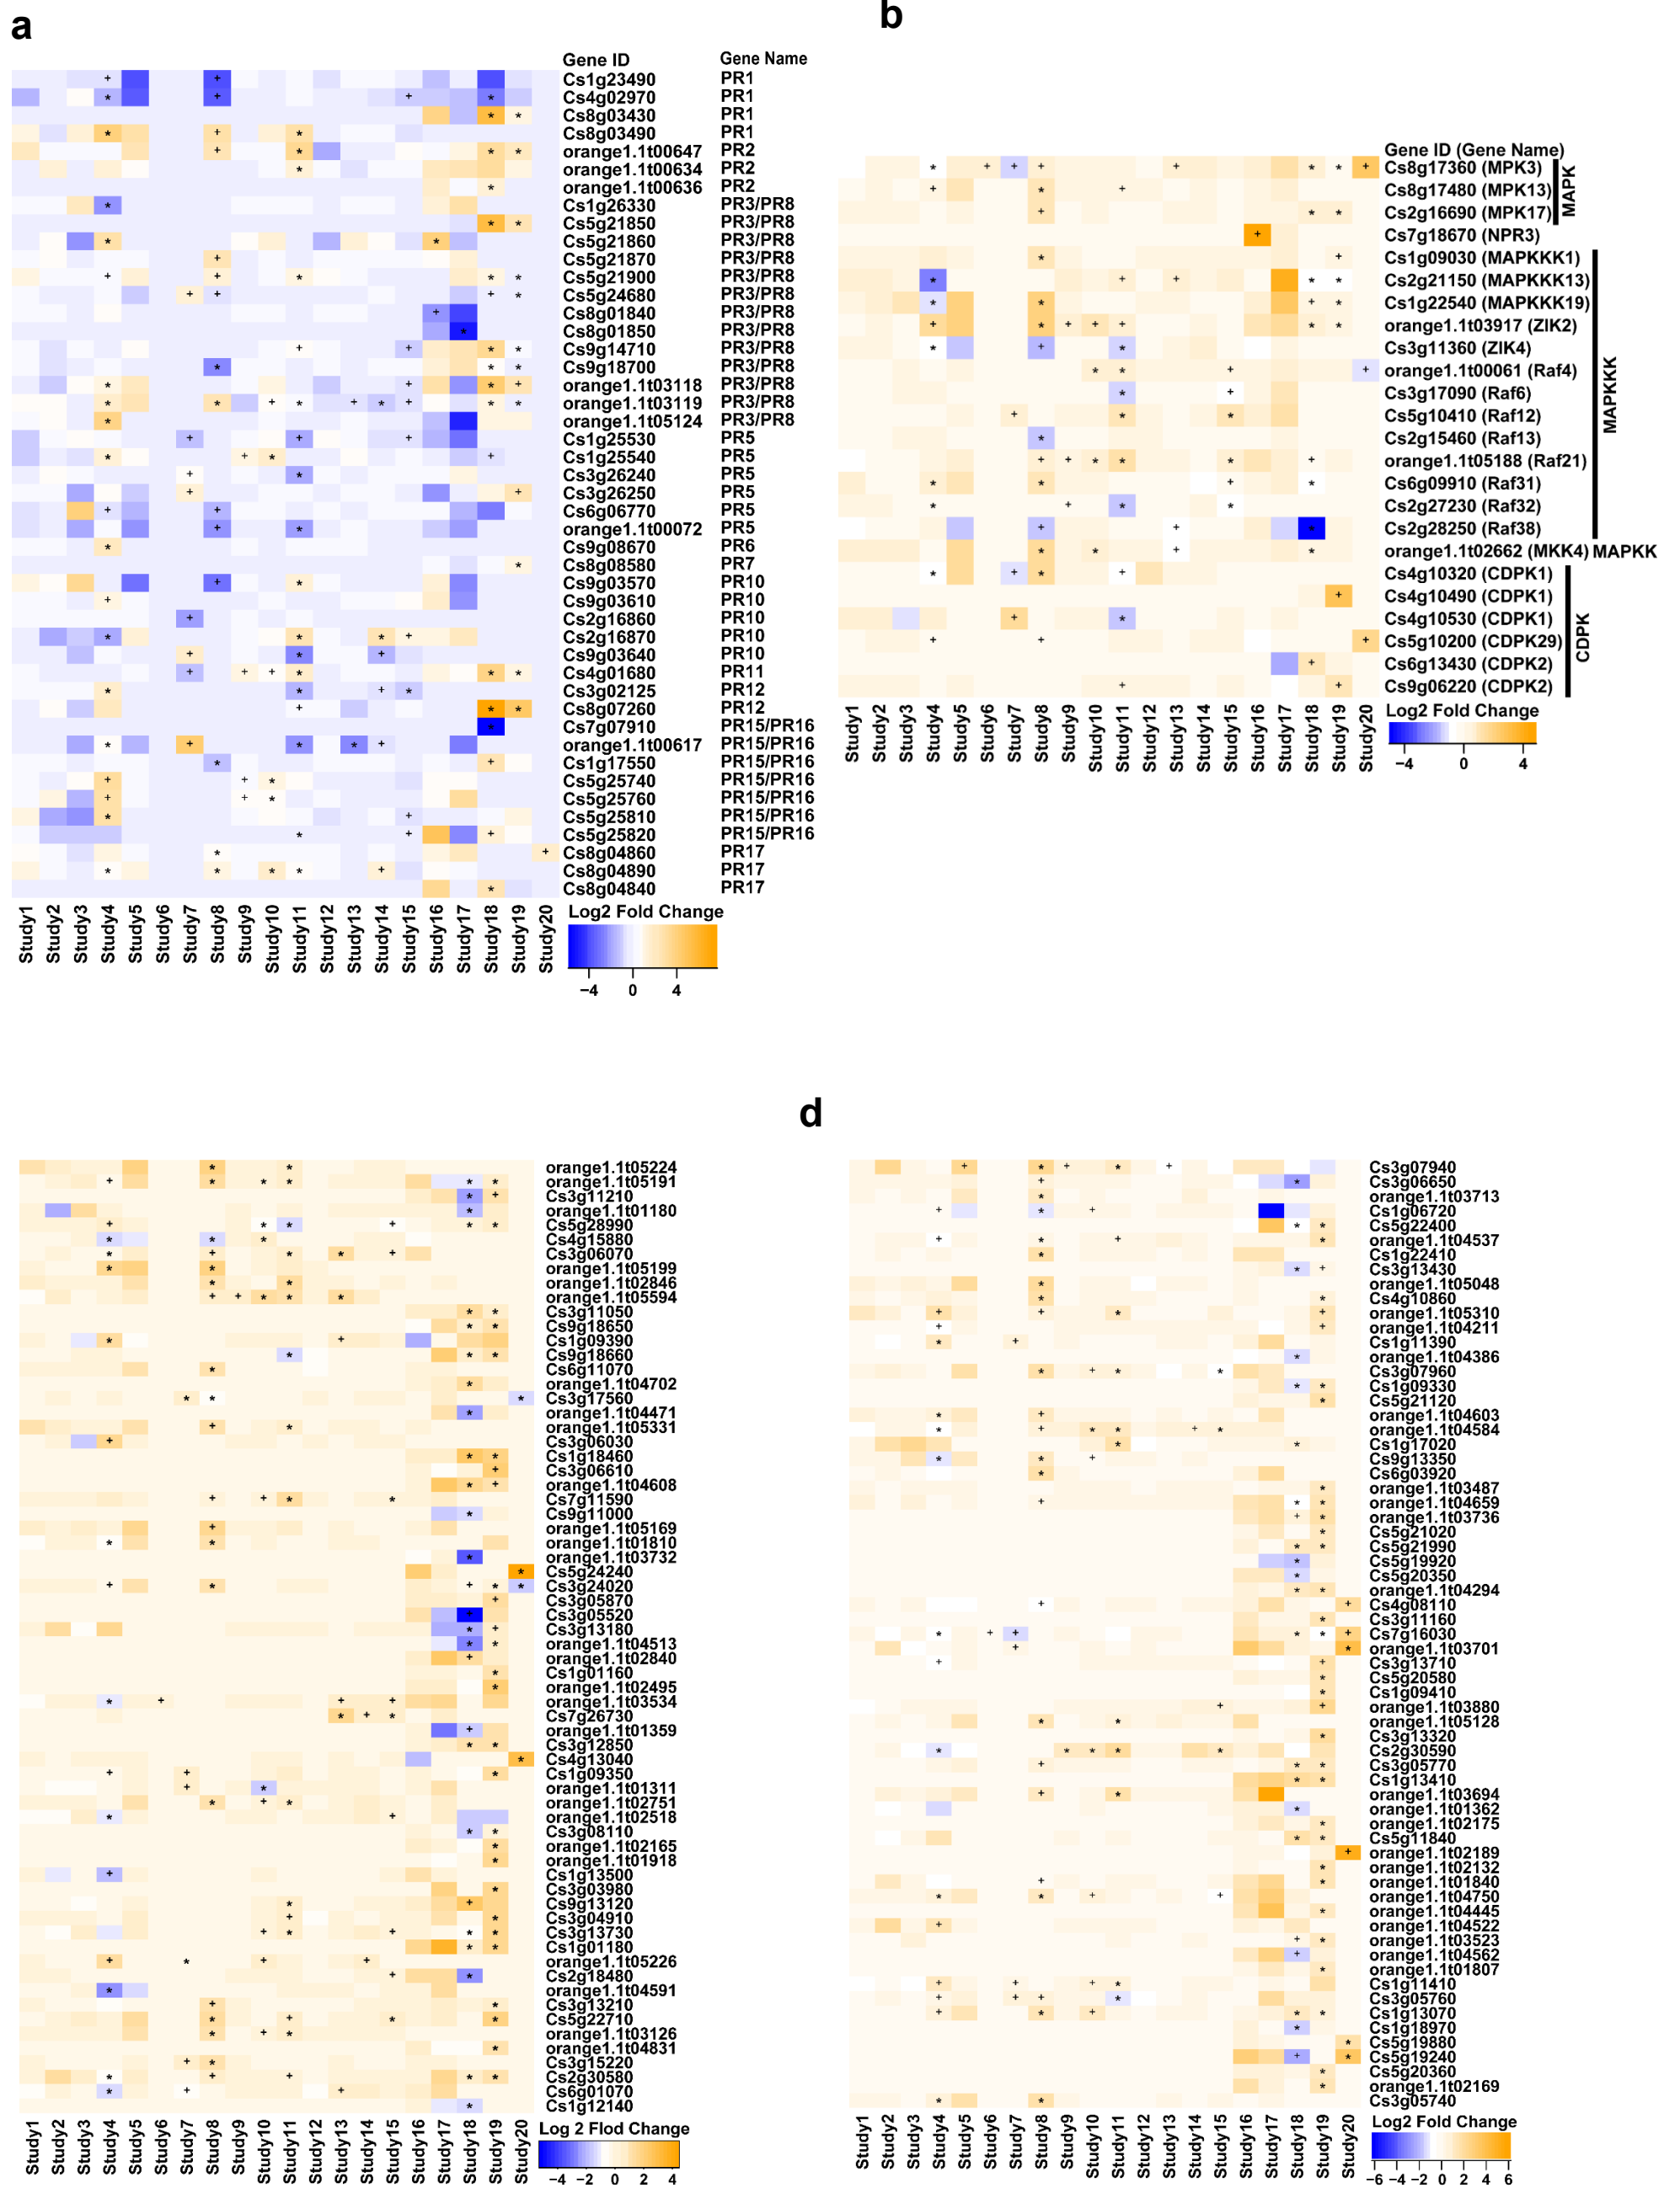

**Fig. S11. The expression profile of immune related genes, including PR, MAPK and NBS-LRR genes in response to CLas infection in 9 previous studies.** Affiliation of each gene is indicated in *brackets*. *Orange* denotes “higher in CLas infected than CLas negative samples” while blue denotes “higher in CLas negative than CLas infected samples”. The asterisk denotes  $P$  value  $< 0.01$ ; the plus sign denotes  $P$  value  $< 0.05$ . (a) PR genes, (b) MAPK genes. (c and d) NBS-LRR genes. The information about the 9 previous studies is listed in Table S2.

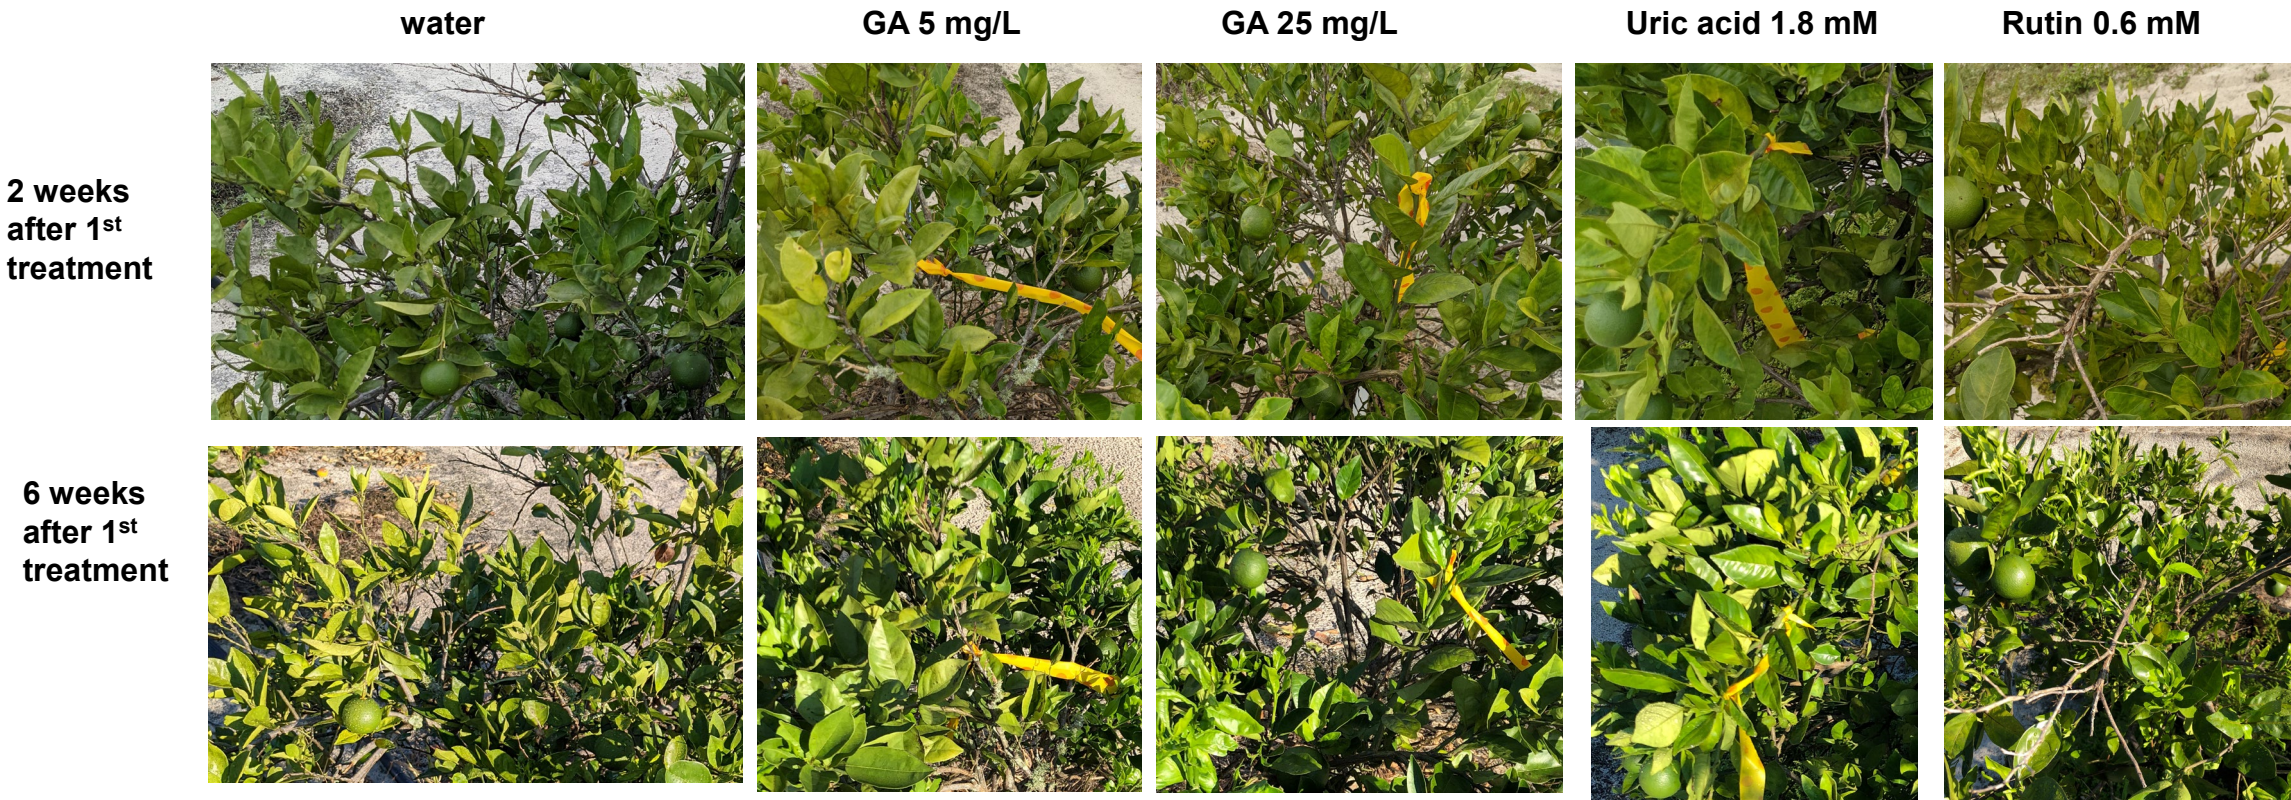

**Fig. S12. Effect of GA and antioxidants treatment on HLB symptoms.** To test the effect of GA treatment on HLB symptoms, HLB positive *C. sinensis* 'Valencia' trees were treated with GA and antioxidants (uric acid and rutin) via foliar spray weekly. Representative branches were selected to demonstrate symptom changes.

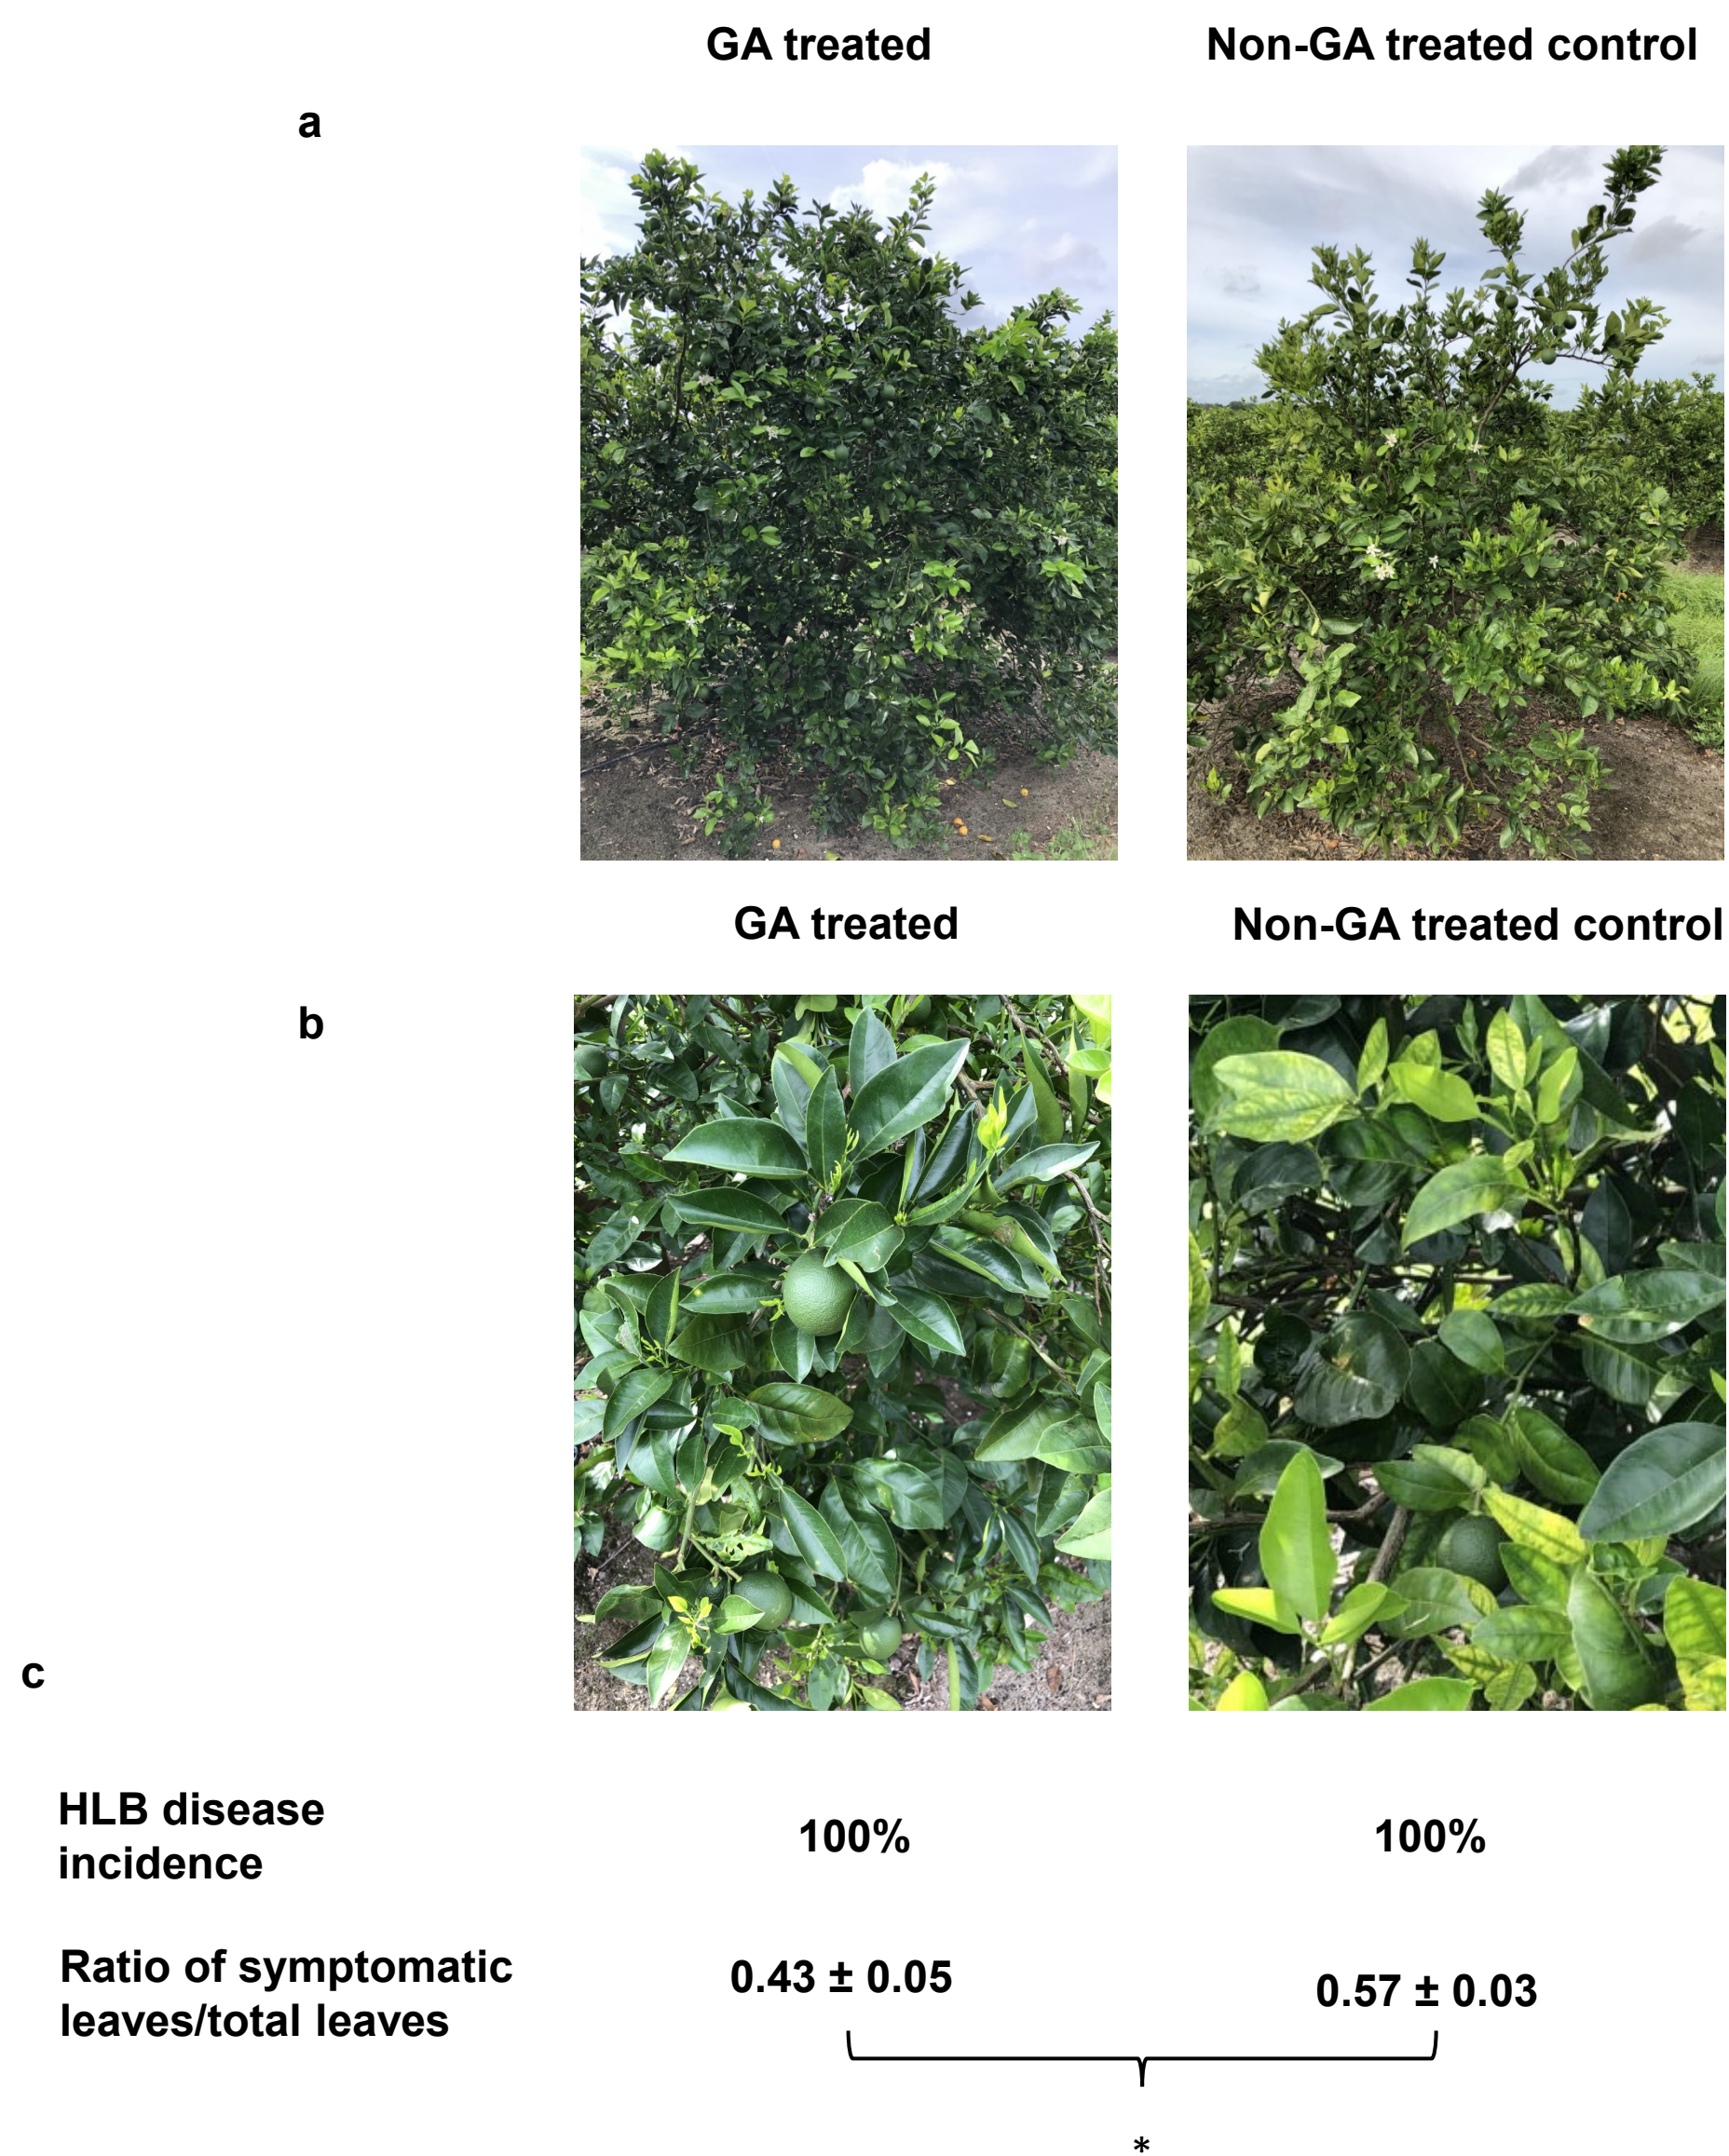

**Fig. S13. Gibberellin (GA) treatment of *C. sinensis* suppresses HLB.** *C. sinensis* 'Vernia' blocks were treated with GA (1247 ppm) in November 2020. Nearby blocks of *C. sinensis* 'Vernia' that were not treated with GA were used as negative controls. Symptoms, HLB disease incidence and ratio of symptomatic leaves/total leaves were investigated in June 2021. (a) Representative whole trees. (b) Representative sections. (c) HLB disease incidence and ratio of symptomatic leaves vs total leaves in different treatments. Pictures were taken at the same day in June 2021. \* indicates p value < 0.05 based on Student's t-test.

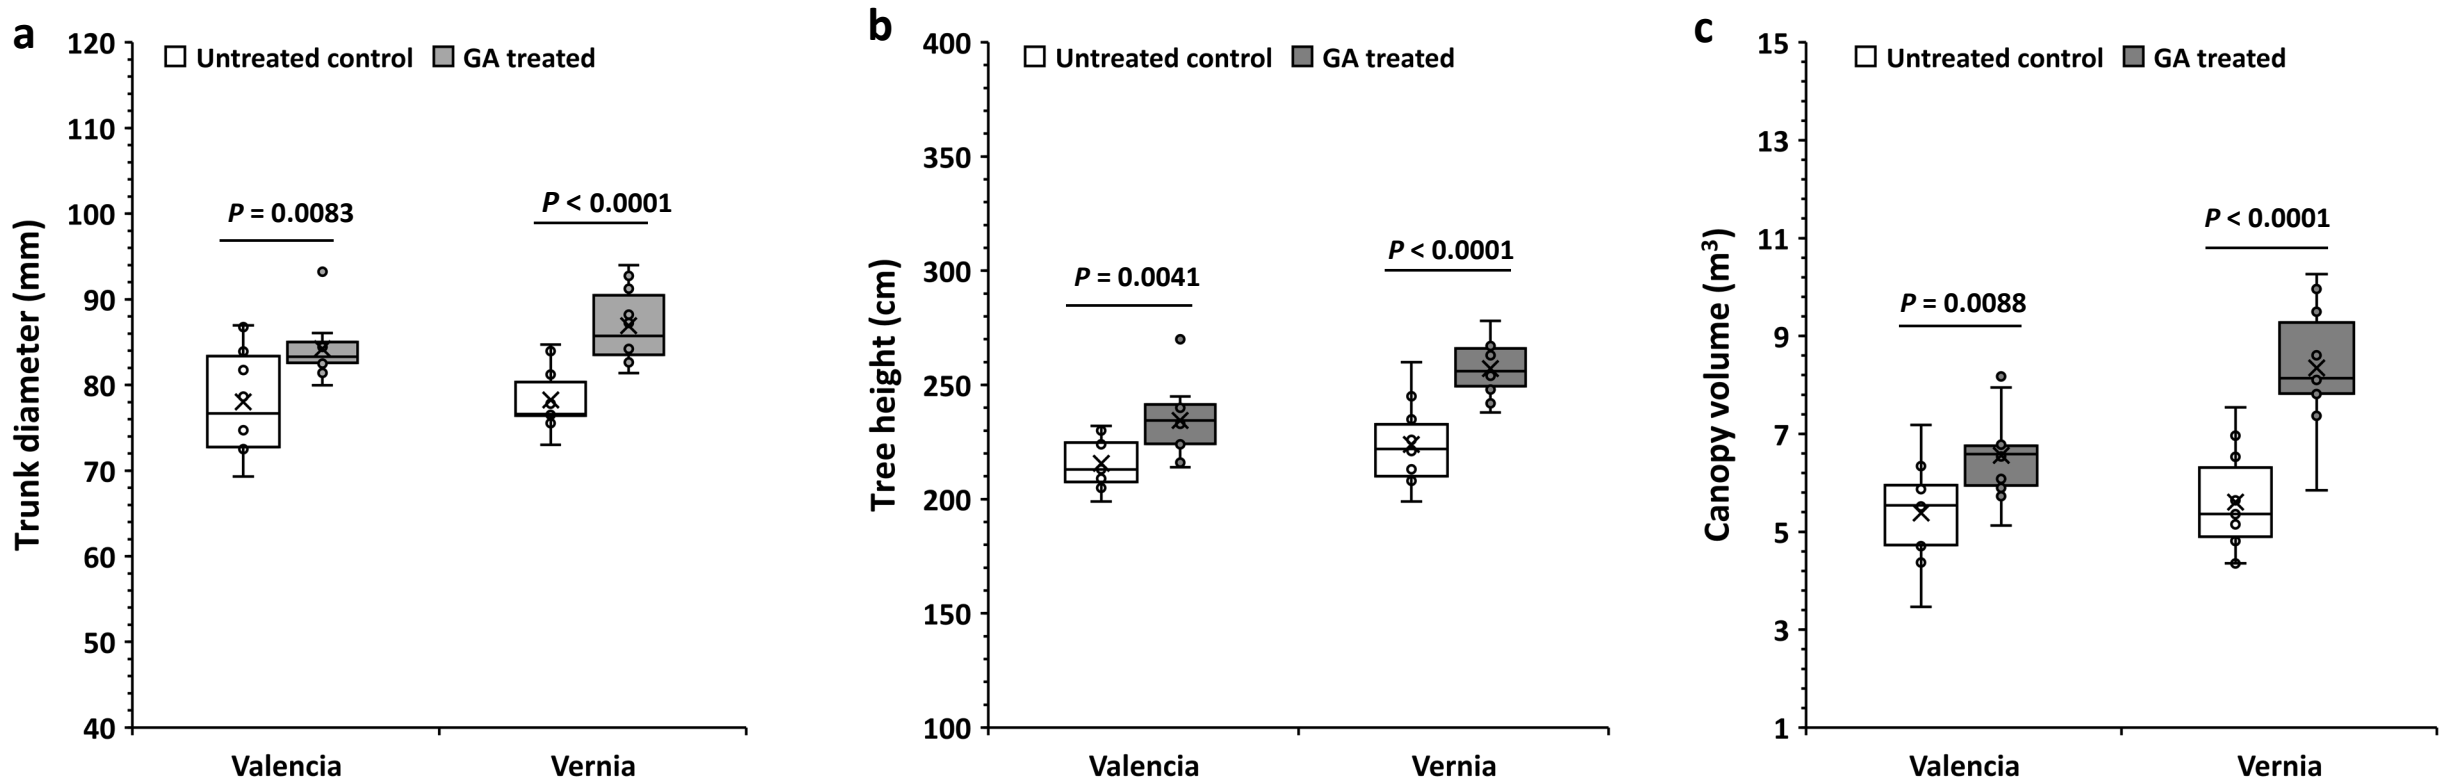

**Fig. S14. Growth performance of citrus trees (two cultivars: Valencia and Vernia) treated by GA in commercial groves in FL.** *C. sinensis* blocks were treated with GA (1247 ppm) in November 2020. Nearby blocks of *C. sinensis* that were not treated with GA were used as negative controls. Trees were investigated in June 2021. (a) Trunk diameter measured at ~20 cm above the ground. (b) Tree height above the ground from the soil surface to the apical point of the plant. (c) Canopy volume of the GA treated and untreated control trees. Data shown are means of 10 replicated trees (n = 10). Statistical analysis was performed using two-tailed Student's t-test and a significant difference between GA treated and untreated control trees was determined at  $P < 0.05$ . Box plots: central line represents the median, box edges delimit lower and upper quartiles, whiskers display the highest and lowest data points, and dots above the boxes are outliers. Source data are provided as a Source Data file.

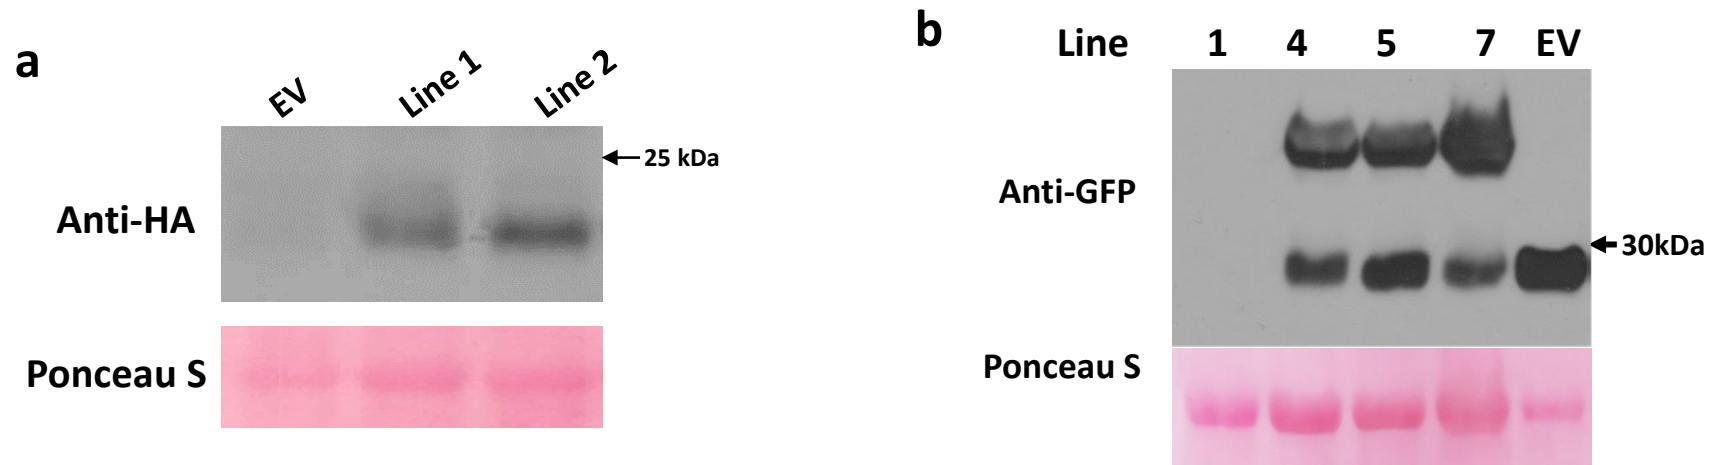

**Fig. S15. Confirmation of transgenic plants using immunoblotting.** a. The transgenic 'Pineapple' sweet orange (*Citrus sinensis* (L.) Osbeck) plants were confirmed using immunoblotting using the anti-HA antibody. Ponceau S stained membrane was used as a loading control. A citrus plant transformed with empty vector was used as the negative control. b. Transgenic Arabidopsis constitutively expressing CLas proteins was validated by immunoblotting. Immunoblotting was conducted using the anti-GFP antibody. Ponceau S stained membrane was used as a loading control. Empty vector transformed Arabidopsis was used as the negative control.
