# Supplementary material for: Citrus Huanglongbing is a pathogen-triggered immune disease that can be mitigated with antioxidants and gibberellin
Source: PubMed Central journal article supplement (PMC8791970; doi:10.1038/s41467-022-28189-9), 2022-01-26
Supplement: 41467_2022_28189_MOESM3_ESM.pdf [file 41467_2022_28189_MOESM3_ESM.pdf]

**Title:** Supplementary Data 1:

**Description:** Differentially expressed genes between GA and non-GA (nGA) treated *Citrus sinensis* protoplast cells in the presence of 1.8 mM H<sub>2</sub>O<sub>2</sub>.
